# Supplementary material
Source: publisher figshare collection journal article supplement (https://acs.figshare.com/ndownloader/files/3850093)
Supplement: Supplementary file 1 [file 3850093]

## **Supporting Information**

### **Impacts of emerging contaminants on surrounding aquatic environment from a youth festival**

**Jheng-Jie Jiang<sup>1</sup>, Chon-Lin Lee<sup>1,2,3,4,\*</sup>, Meng-Der Fang<sup>5</sup>, Bo-Wen Tu<sup>1</sup>, Yu-Jen Liang<sup>5</sup>**

<sup>1</sup> Department of Marine Environment and Engineering, National Sun Yat-sen University, Kaohsiung 80424, Taiwan

<sup>2</sup> Department of Public Health, College of Health Science, Kaohsiung Medical University, Kaohsiung 80424, Taiwan

<sup>3</sup> Asia-Pacific Ocean Research Center, National Sun Yat-sen University, Kaohsiung 80424, Taiwan

<sup>4</sup> Research Center of Environmental Medicine, Kaohsiung Medical University, Kaohsiung 80424, Taiwan

<sup>5</sup> Green Energy and Environment Research Laboratories, Industrial Technology Research Institute, Hsinchu 30011, Taiwan

\* Corresponding author.

E-mail address: [linnohc@mail.nsysu.edu.tw](mailto:linnohc@mail.nsysu.edu.tw) (C-L Lee)

## **Contents**

Text S1-S3

Figure S1-S5

Table S1-S12

References

## **Text S1. Materials and Methods.**

### **Chemicals and standards.**

LC-MS-grade methanol and acetonitrile were obtained from J.T. Baker (Phillipsburg, PA, USA). ACS-grade formic acid and hydrochloric acid were obtained from Fluka (Buchs, Switzerland). ACS-grade ammonium acetate was purchased from Sigma-Aldrich (St. Louis, MO, USA). Analytical-grade disodium ethylenediamine tetra-acetate ( $\text{Na}_2\text{EDTA}$ ) was obtained from Mallinckrodt Baker (Phillipsburg, PA, USA). Deionized (DI) water was prepared with a Milli-Q water purification system (Millipore, Bedford, MA, USA).

Thirty ECs, including analgesics, antibiotics, lipid regulators,  $\beta$ -blockers, antiepileptic drugs, antidepressants, caffeine, ulcer healing compounds, UV filters, and illicit drugs/controlled substances, were selected as target compounds. Most of the target ECs are frequently used in prescriptions, over-the-counter medications, human treatments, veterinary medicines, and drugs of abuse in Taiwan. These ECs are also reported in many other locations, such as Europe, the USA, Japan, Korea, and China <sup>1-6</sup>. Detailed physiochemical properties of the selected ECs are presented in the Table S1. Acetaminophen, acetaminophen- $\text{d}_4$ , diclofenac, ibuprofen, ketoprofen, naproxen, salicylic acid, codeine, ampicillin, gemfibrozil, carbamazepine, fluoxetine, atenolol, caffeine, omeprazole, amphetamine, amphetamine- $\text{d}_{11}$ , methamphetamine, methamphetamine- $\text{d}_{14}$ , cocaine, heroin, ketamine, pseudoephedrine, cannabinal, flunitrazepam, 3,4-methylenedioxymethamphetamine (MDMA), MDMA- $\text{d}_5$ , and gamma-hydroxybutyric acid (GHB) were obtained from Cerilliant (Round Rock, TX, USA). Sulfamethoxazole, tetracycline, erythromycin- $\text{H}_2\text{O}$ , and clofibrilic acid were purchased from Sigma-Aldrich (St. Louis, MO, USA). Benzophenone-3 and benzophenone-4 were obtained from Fluka (Buchs, Switzerland).  $^{13}\text{C}_3$ -caffeine and  $^{13}\text{C}_6$ -ibuprofen (1 mg/mL) were purchased from Cambridge Isotope Laboratories (Andover, MA, USA). Stock standard solutions of 1,000 mg/L were prepared in methanol and stored in amber glass bottles at  $-20^\circ\text{C}$  for a maximum of 15 days. Working solutions were prepared by diluting the stock standard

solution in methanol.

### **LC-MS/MS analysis**

The instrumental analysis method was optimized based on the method described by several authors and our previous study.<sup>7-17</sup> Chromatography was performed using an Agilent 1200 module (Agilent Technologies, Palo Alto, CA, USA). The injection volumes for method 1 and method 2 were 50 and 10  $\mu$ L, respectively, and the auto-sampler was operated at 25°C. Separation in method 1 was performed on a 150  $\times$  4.6 mm ZORBAX Eclipse XDB-C18 column with a 5  $\mu$ m particle size (Agilent, Palo Alto, CA, USA) and a mobile phase consisting of 0.1% formic acid (v/v), 5 mM ammonium acetate in DI water (mobile phase A), and 0.1% formic acid (v/v) in methanol (mobile phase B) gradient. The flow rate was kept constant at 1.0 mL/min. The gradient began with a 0% mobile phase B for 0.5 min, increasing to 40% from 0.5–3.0 min, to 70% from 3.0–7.5 min, to 95% from 7.5–9.0 min, and remaining at 95% until 11 min, decreasing to 0% from 11–12 min, and remaining at 0% thereafter (Table S4). Separation in method 2 was performed using a Kinetex PFP column (Phenomenex, Torrance, CA, USA, 100  $\times$  2.1 mm, 2.6  $\mu$ m). The flow rate through the column was 300  $\mu$ L/min, with gradient elution conditions initiating at 10% mobile phase B, increasing to 95% at 6 min and maintained before reverting to the original conditions at 10 min. The compositions of the mobile phase for method 2 were as follows: (A) deionized water/0.1% formic acid and (B) acetonitrile/0.1% formic acid.

Mass spectrometry was performed using an API 4000 triple quadrupole mass spectrometer (Applied Biosystems, Foster City, CA) with an electrospray ionization source set to operate in positive/negative mode. The conditions for the mass spectrometer were as follows: ion spray voltage at 5.0 kV; curtain gas, nebulizer gas, and turbo gas at 10, 60, and 50 L/h, respectively; heated capillary temperature at 550°C; and collisionally activated dissociation at 7 (Table S5). After selecting the precursor ions, product ions were obtained and optimized using four key parameters: declustering potential, entrance potential, collision

energy, and collision cell exit potential. Ions were acquired in MRM modes with a dwell time of 200 ms and unit mass resolution on both mass analyzers. Two MRM pairs were used to identify the target compounds (Table S6).

For all the compounds, wide linearity ranges were obtained for the quantification. The calibration curve used in this study was constructed using least-squares linear regression analysis, and subjecting them to the same SPE procedures used for the environmental water samples instead of performing standard addition method in every sample. In this study, two types of recovery experiments were performed in DI water, river water, and wastewater samples: (1) Recovery experiments for isotopically labelled standards (surrogate standards) were performed in all DI water, river water and wastewater samples; and (2) the recovery experiments for spiking 500 ng/L target analytes standards were performed only in DI water, river water and effluent samples (n=12), which did not contain extremely high levels of target analytes, and therefore, their recoveries could be estimated. The mean recoveries of isotopically labeled surrogate standards in all samples were  $82\pm13\%$  (acetaminophen- $d_4$ ),  $87\pm11\%$  (amphetamine- $d_{11}$ ),  $85\pm12\%$  (methamphetamine- $d_{14}$ ),  $78\pm9.0\%$  (MDMA- $d_5$ ),  $92\pm8.0\%$  ( $^{13}C_6$ -ibuprofen), and  $89\pm11\%$  ( $^{13}C_3$ -caffeine), respectively. The mean recoveries (spiking 500 ng/L target analytes standards) in DI water ranged from 79% to 108%, compared with 83% to 115% in river water and 69% to 128% in effluents. As spiked environmental water samples already contained target compounds, blanks (non-spiked samples) were analyzed to determine their concentrations, which were afterward subtracted from the spiked environmental water samples.

The LOQs for the wastewaters were difficult to determine because the samples already contained some the selected analytes and the matrix interference was serious. Therefore, LOQs in the water samples were defined as a signal-to-noise (S/N) ratios of 10. The results indicated that the LOQs for each compound ranged from 0.04 ng/L to 3 ng/L for DI water, from 0.04 ng/L to 10 ng/L for river water, from 1 ng/L to 10 ng/L for influent samples, and from 2

ng/L to 10 ng/L for effluent samples.

## **Text S2. Derivation of PNECs and risk assessment**

The potential for contamination to cause undesired environmental effects can be estimated from an index of environmental risk assessment.<sup>18-21</sup> Usually, risk quotient (RQ) is calculated from the ratio of a measured environmental concentration (MEC) and a predicted no-effect concentration (PNECs: the concentration at which no adverse effect is suspected to occur) using the lowest value for each endpoint, as shown in Equation (a):

$$RQ = \frac{MEC}{PNECs}$$

A commonly used risk ranking criterion was applied: RQ (risk quotients) <0.1 means minimal risk,  $0.1 \leq RQ < 1$  means median risk, and  $RQ \geq 1$  means high risk.<sup>22</sup>

Derivation of PNECs was based on chronic toxicity data available in the literature.<sup>22-27</sup> PNECs are calculated by dividing the lowest chronic no-observed-effect concentrations (NOECs) by assessment factors (AFs) chosen according to the European Technical Guidance Document.<sup>28</sup> PNEC values for ibuprofen and ketoprofen were based on aquatic toxicity data to marine species from the literature (mainly toxicological studies of *Daphnia magna* and *Vibrio fischeri*). PNEC value for erythromycin-H<sub>2</sub>O was based on aquatic toxicity data from toxicological studies with *Pseudokirchneriella subcapitata*. Due to a lack of aquatic chronic toxicity data in the literature, derivation of some PNECs via the species sensitivity distribution method was not possible. Therefore, these PNEC values were estimated using the Ecological Structure Activity Relationships (ECOSAR) models from the US Environmental Protection Agency. The lowest LC50 value and assessment factor of 1000 were chosen according to the European Commission's Technical Guidance Document.<sup>28</sup> PNECs for the examined CECs in this study were showed in Table S12.

### **Text S3. Removal of ECs in WWTPs**

The removal efficiency percentage for ECs by the wastewater treatment processes was calculated based on the influent and effluent concentration difference divided by the influent concentrations, with complete data shown in the Supporting Information (see Table S9). Fig. S4 summarizes the average removal efficiency for 26 ECs in the WWTPs. In general, the encountered ECs could be divided into three groups depending on their removal percentages: limited removal, <30%; moderate removal, 30–70%; and effective removal, >70%.

The investigated ECs were not always sufficiently removed via the conventional wastewater treatment processes applied in WWTPs in the Kenting area. Therefore, diverse removal efficiencies for 26 detected ECs (14–100%) were found throughout the treatment processes, with the exception of ketoprofen, clofibric acid, and FM2, for which there no removal was observed in the WWTPs. Most EC compounds showed moderate removal efficiencies, ranging from 32% to 67%, in good agreement with most previously reported values. For example, diclofenac was the poorest removed analgesic compound, with an average removal efficiency of 32%. The poor removal of diclofenac is probably due to the combination of degradation in wastewater together with the liberation of additional diclofenac molecules by the de-conjugation of glucoroonidated or sulfated diclofenac and/or its desorption from particles.<sup>31</sup>

The removal efficiency for sulfamethoxazole in our study was 38%, which is comparable with studies performed in Sweden,<sup>32</sup> Croatia,<sup>33</sup> and China.<sup>34</sup> In contrast, Gobel et al.<sup>35</sup> reported low and highly variable removal efficiency for sulfamethoxazole during secondary treatment in two Swiss WWTPs, which was interpreted to be a consequence of the re-transformation of sulfonamide metabolites during the wastewater treatment processes. The average removal efficiencies of naproxen and gemfibrozil were 45% and 61%, respectively. Their

moderate elimination rates are consistent with the results reported by several authors.<sup>26, 34</sup>

Eight EC compounds (acetaminophen, salicylic acid, benzophenone-3, benzophenone-4, amphetamine, cocaine, heroin, and pseudoephedrine) were found at effective eliminated rates (>70%). Both salicylic acid and benzophenone-4 were the most effectively eliminated EC compounds (>99%). Martin et al.<sup>31</sup> reported that the anti-inflammatory drug salicylic acid was the most effectively removed pharmaceutical compound in the WWTPs from Spain. Since this compound has a low  $pK_a$  value, it is expected to be found mainly in the aqueous phase. The removal of salicylic acid from wastewater could be explained by biodegradation instead of by sorption onto sludge. The removal efficiencies of acetaminophen, benzophenone-3, cocaine, and heroin were also quite high (83–92%) in this study. Stackelberg et al.<sup>36</sup> monitored a higher level of removal for acetaminophen (>98%) in the USA due to its hydrophilic characteristic ( $\log K_{ow} < 1.0$ ). However, the removal efficiencies of ampicillin, carbamazepine, and GHB were limited, with average removal efficiencies of 18%, 27%, and 15%, respectively. Carbamazepine is a pharmaceutical compound with a high chemical stability to the point that it has been proposed as an anthropogenic marker.<sup>37</sup> The partial removal of carbamazepine was also observed by other authors.<sup>26, 34</sup>

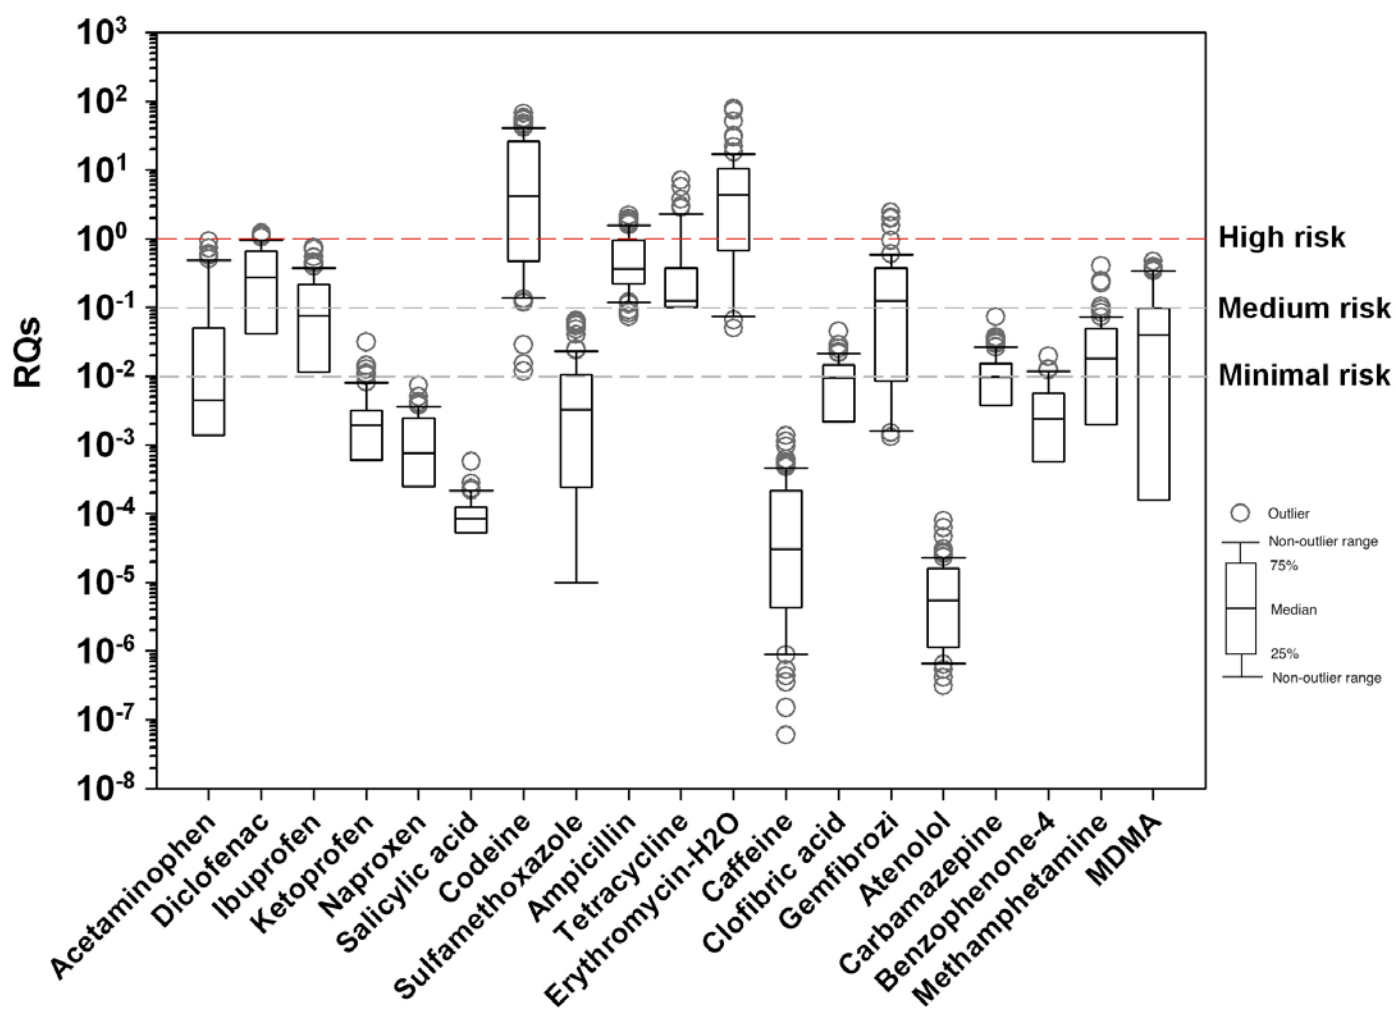

**Figure S1.** Boxplots for the calculated risk quotients (RQs) of the ECs detected in this study.



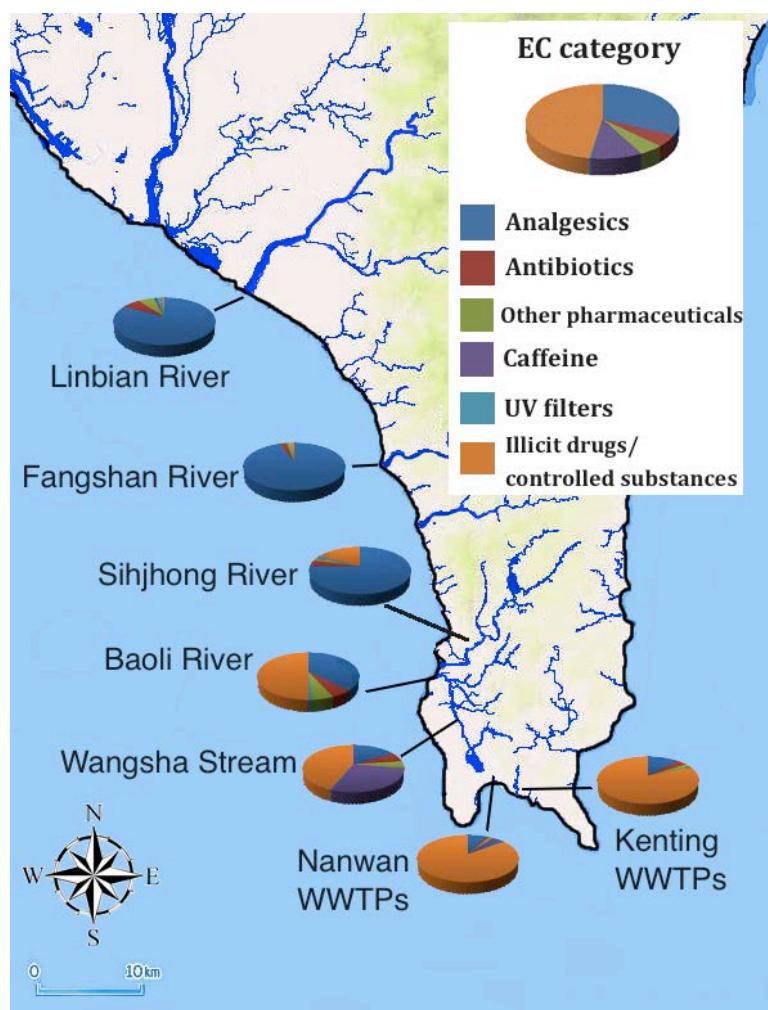

**Figure S2.** Mean relative contribution of detected ECs in this study

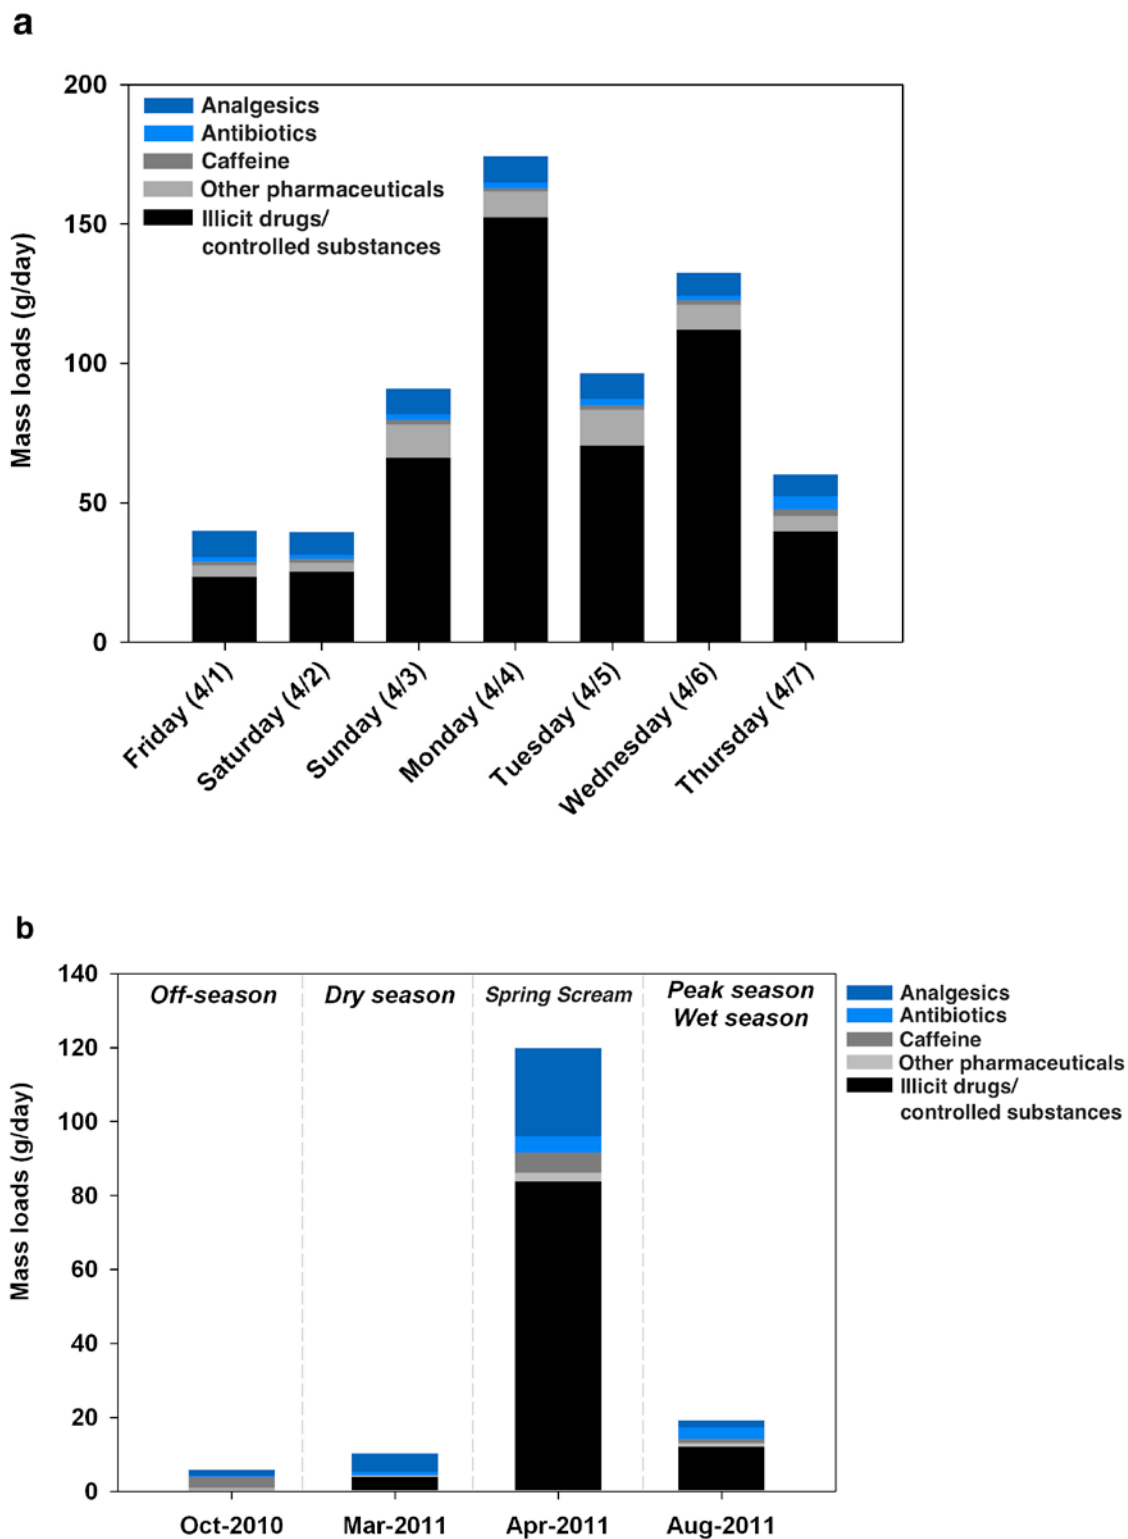

**Figure S3.** Estimated daily discharges from WWTP effluents into aquatic environments. (a) Spring Scream; (b) different sampling campaigns.

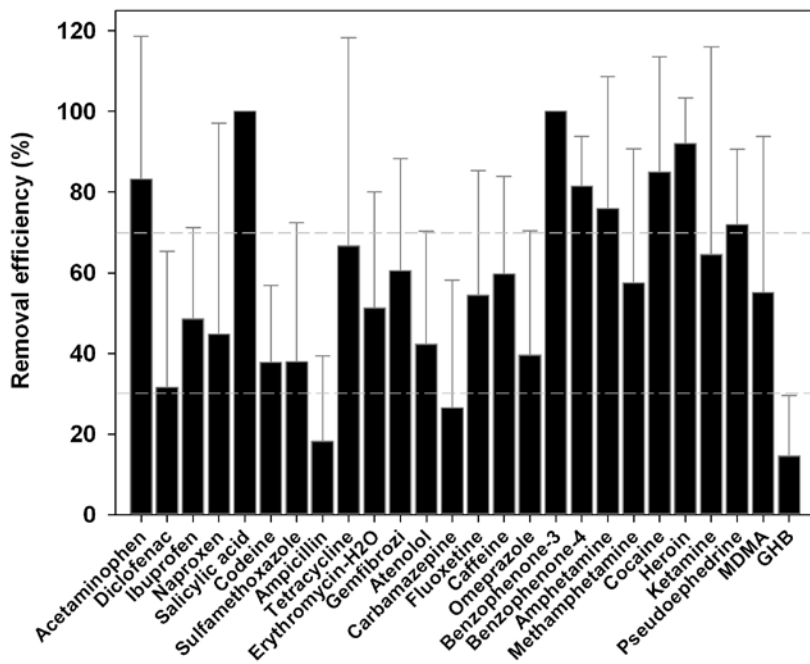

**Figure S4.** Average removal efficiency of the ECs in the two WWTPs.

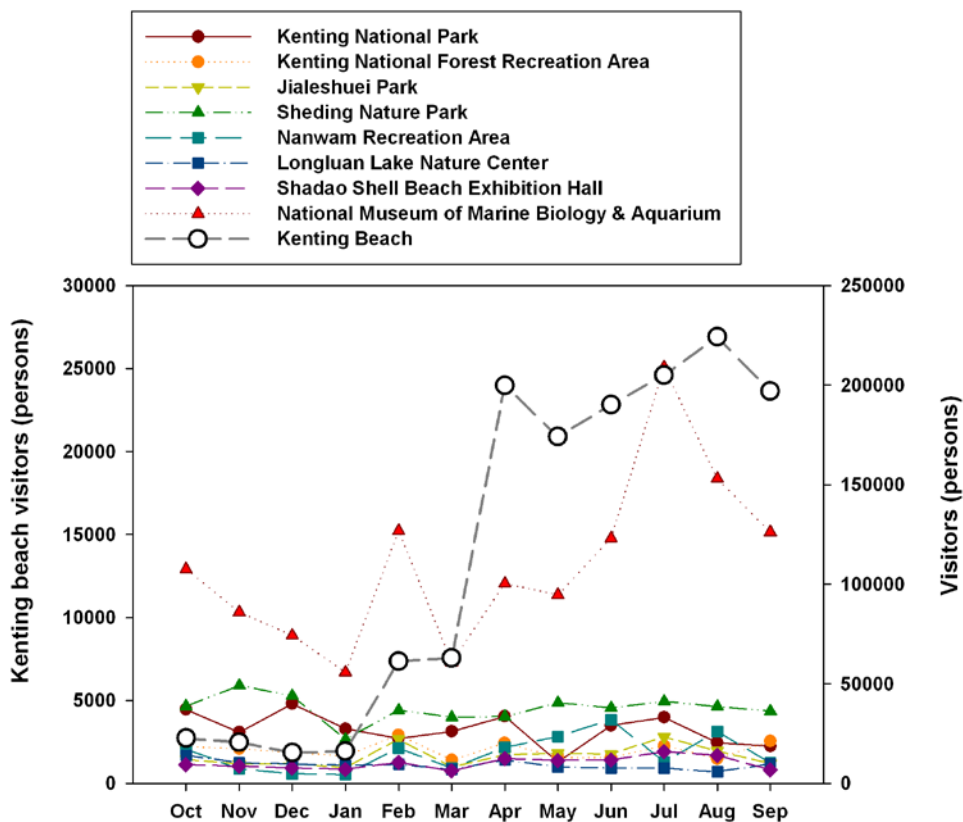

**Figure S5.** Number of the visitors in different location from the Kenting area between Oct 2010 and Sep 2011.

**Table S1.** CAS number, formula, molecular weight, logK<sub>ow</sub>, logK<sub>oc</sub>, melting point, vapor pressure, and solubility of the selected ECs.

| Compounds                                               | CAS No.    | Formula                                                             | Molecular weight | logK <sub>ow</sub> | logK <sub>oc</sub> | Melting point (°C) | Vapor pressure (mmHg 25) | Solubility (g/L)       |
|---------------------------------------------------------|------------|---------------------------------------------------------------------|------------------|--------------------|--------------------|--------------------|--------------------------|------------------------|
| <b>Analgesics</b>                                       |            |                                                                     |                  |                    |                    |                    |                          |                        |
| Acetaminophen                                           | 103-90-2   | C <sub>8</sub> H <sub>9</sub> N O <sub>2</sub>                      | 151.17           | 0.46               | 1.654              | 170                | 1.94x10 <sup>-6</sup>    | 14                     |
| Diclofenac                                              | 15307-79-6 | C <sub>14</sub> H <sub>10</sub> Cl <sub>2</sub> N O <sub>2</sub> Na | 318.14           | 0.7                | 2.661              | 284                | 3.13x10 <sup>-14</sup>   | 2.43 <sup>b</sup>      |
| Ibuprofen                                               | 15687-27-1 | C <sub>13</sub> H <sub>18</sub> O <sub>2</sub>                      | 206.28           | 3.97               | 2.626              | 76                 | 1.86x10 <sup>-4</sup>    | 0.021                  |
| Ketoprofen                                              | 22071-15-4 | C <sub>16</sub> H <sub>14</sub> O <sub>3</sub>                      | 254.29           | 3.12               | 2.586              | 94                 | 1.46x10 <sup>-6</sup>    | 0.051                  |
| Naproxen                                                | 22204-53-1 | C <sub>14</sub> H <sub>14</sub> O <sub>3</sub>                      | 230.27           | 3.18               | 2.525              | 153                | 1.27x10 <sup>-6</sup>    | 0.016                  |
| Salicylic acid (The metabolite of acetylsalicylic acid) | 69-72-7    | C <sub>7</sub> H <sub>6</sub> O <sub>3</sub>                        | 138.12           | 2.26               | 1.336              | 158                | 3.19x10 <sup>-5</sup>    | 2.24                   |
| Codeine (opioids)                                       | 76-57-3    | C <sub>18</sub> H <sub>21</sub> N O <sub>3</sub>                    | 299.37           | 1.19               | 2.845              | 280                | 1.91x10 <sup>-10</sup>   | 9                      |
| <b>Antibiotics</b>                                      |            |                                                                     |                  |                    |                    |                    |                          |                        |
| Sulfamethoxazole                                        | 723-46-6   | C <sub>10</sub> H <sub>11</sub> N <sub>3</sub> O <sub>3</sub> S     | 253.28           | 0.89               | 2.412              | 167                | 1.30x10 <sup>-7</sup>    | 0.61                   |
| Ampicillin                                              | 69-53-4    | C <sub>16</sub> H <sub>19</sub> N <sub>3</sub> O <sub>4</sub> S     | 349.41           | 1.35               | 1.926              | 198                | 2.84x10 <sup>-13</sup>   | 10.1                   |
| Tetracycline                                            | 60-54-8    | C <sub>22</sub> H <sub>24</sub> N <sub>2</sub> O <sub>8</sub>       | 444.44           | -1.3               | 1.644              | 178                | 2.08x10 <sup>-21</sup>   | 0.23                   |
| Erythromycin-H <sub>2</sub> O                           | 114-07-8   | C <sub>37</sub> H <sub>67</sub> N O <sub>13</sub>                   | 733.95           | 3.06               | 2.754              | 191                | 2.12x10 <sup>-25</sup>   | 5.17x10 <sup>-4b</sup> |
| <b>Lipid regulator</b>                                  |            |                                                                     |                  |                    |                    |                    |                          |                        |
| Clofibric acid                                          | 882-09-7   | C <sub>10</sub> H <sub>11</sub> Cl O <sub>3</sub>                   | 214.65           | 2.57               | 1.64               | 118-119            | 7.54x10 <sup>-5</sup>    | 0.58 <sup>b</sup>      |
| Gemfibrozil                                             | 25812-30-0 | C <sub>15</sub> H <sub>22</sub> O <sub>3</sub>                      | 250.34           | 4.77 <sup>a</sup>  | 2.636              | 62                 | 3.05x10 <sup>-5</sup>    | 4.96x10 <sup>-3b</sup> |

| Compounds                                   | CAS No.    | Formula                                                         | Molecular weight | logK <sub>ow</sub> | logK <sub>oc</sub> | Melting point (°C) | Vapor pressure (mmHg 25) | Solubility (g/L)   |
|---------------------------------------------|------------|-----------------------------------------------------------------|------------------|--------------------|--------------------|--------------------|--------------------------|--------------------|
| <b>β-blockers</b>                           |            |                                                                 |                  |                    |                    |                    |                          |                    |
| Atenolol                                    | 29122-68-7 | C <sub>14</sub> H <sub>22</sub> N <sub>2</sub> O <sub>3</sub>   | 266.34           | 0.16               | 1.825              | 147                | 7.69x10 <sup>-10</sup>   | 13.3               |
| <b>Antiepileptic drugs</b>                  |            |                                                                 |                  |                    |                    |                    |                          |                    |
| Carbamazepine                               | 298-46-4   | C <sub>15</sub> H <sub>12</sub> N <sub>2</sub> O                | 236.28           | 2.45               | 3.123              | 190.2              | 8.80x10 <sup>-8</sup>    | 0.112              |
| <b>Antidepressants</b>                      |            |                                                                 |                  |                    |                    |                    |                          |                    |
| Fluoxetine                                  | 54910-89-3 | C <sub>17</sub> H <sub>18</sub> F <sub>3</sub> N O              | 309.33           | 4.05               | 4.971              | 105.27             | 2.52x10 <sup>-5</sup>    | 0.06 <sup>b</sup>  |
| <b>Caffeine</b>                             |            |                                                                 |                  |                    |                    |                    |                          |                    |
|                                             | 58-08-2    | C <sub>8</sub> H <sub>10</sub> N <sub>4</sub> O <sub>2</sub>    | 194.19           | -0.07              | 1                  | 238                | 7.33x10 <sup>-9</sup>    | 21.6               |
| <b>Ulcer healing</b>                        |            |                                                                 |                  |                    |                    |                    |                          |                    |
| Omeprazole                                  | 73590-58-6 | C <sub>17</sub> H <sub>19</sub> N <sub>3</sub> O <sub>3</sub> S | 345.42           | 2.23               | 3.163              | 156                | 1.16x10 <sup>-11</sup>   | 0.082 <sup>b</sup> |
| <b>UV filters</b>                           |            |                                                                 |                  |                    |                    |                    |                          |                    |
| Benzophenone-3                              | 131-57-7   | C <sub>14</sub> H <sub>12</sub> O <sub>3</sub>                  | 228.25           | 3.79               | 2.98               | 65.5               | 6.62x10 <sup>-6</sup>    | 0.069              |
| Benzophenone-4                              | 4065-45-6  | C <sub>14</sub> H <sub>12</sub> O <sub>6</sub> S                | 308.31           | 0.37 <sup>a</sup>  | 1.825              | 145                | 1.34x10 <sup>-11</sup>   | 250                |
| <b>Illicit drugs/controlled substances*</b> |            |                                                                 |                  |                    |                    |                    |                          |                    |
| Amphetamine                                 | 300-62-9   | C <sub>9</sub> H <sub>13</sub> N                                | 135.21           | 1.76               | 2.883              | 11.3               | 3.1x10 <sup>-1</sup>     | 28 <sup>b</sup>    |
| Methamphetamine                             | 537-46-2   | C <sub>10</sub> H <sub>15</sub> N                               | 149.24           | 2.07               | 2.951              | 172.5              | 4.48x10 <sup>-3</sup>    | 13.3 <sup>b</sup>  |
| Cocaine                                     | 50-36-2    | C <sub>17</sub> H <sub>21</sub> NO <sub>4</sub>                 | 303.36           | 2.3                | 2.9                | 98                 | 1.29x10 <sup>-5</sup>    | 1.8                |

| Compounds                                     | CAS No.    | Formula                                                         | Molecular weight | logK <sub>ow</sub> | logK <sub>oc</sub> | Melting point (°C) | Vapor pressure (mmHg 25) | Solubility (g/L)     |
|-----------------------------------------------|------------|-----------------------------------------------------------------|------------------|--------------------|--------------------|--------------------|--------------------------|----------------------|
| Heroin                                        | 561-27-3   | C <sub>21</sub> H <sub>23</sub> NO <sub>5</sub>                 | 369.42           | 1.58               | 3.42               | 173                | 7.59x10 <sup>-10</sup>   | 0.6                  |
| Ketamine*                                     | 6740-88-1  | C <sub>13</sub> H <sub>16</sub> Cl NO                           | 237.73           | 2.18               | 3.062              | 92.5               | 5.15x10 <sup>-5</sup>    | 200                  |
| Pseudoephedrine                               | 90-82-4    | C <sub>10</sub> H <sub>15</sub> NO                              | 165.24           | 1.13               | 1.856              | 40                 | 1.07x10 <sup>-2</sup>    | 63.6                 |
| Cannabinol                                    | 521-35-7   | C <sub>21</sub> H <sub>26</sub> O <sub>2</sub>                  | 310.44           | 7.23 <sup>a</sup>  | 5.517              | 77                 | 7.25x10 <sup>-8</sup>    | 2.1x10 <sup>-6</sup> |
| Flunitrazepam (FM2)*                          | 1622-62-4  | C <sub>16</sub> H <sub>12</sub> F N <sub>3</sub> O <sub>3</sub> | 313.29           | 2.06               | 4.075              | 166-167            | 5.96x10 <sup>-9</sup>    | 0.073                |
| 3,4-methylenedioxy-N-methylamphetamine (MDMA) | 42542-10-9 | C <sub>11</sub> H <sub>15</sub> NO <sub>2</sub>                 | 193.25           | 2.15               | 2.357              | 150                | 2.27x10 <sup>-4</sup>    | 7.03                 |
| Gamma-hydroxybutyric acid (GHB)               | 591-81-1   | C <sub>4</sub> H <sub>8</sub> O <sub>3</sub>                    | 104.11           | -0.4 <sup>a</sup>  | 0                  | 45.54              | 3.69x10 <sup>-3</sup>    | 1x103                |

<sup>a</sup> Estimated by KOWWIN v1.68    <sup>b</sup> Water Solubility Estimate from Log Kow

Data from EPI suite, U.S. Environmental Protection Agency.

**Table S2.** Description of the sampling sites.

| Site          | Type     | Influence           | Note                    |
|---------------|----------|---------------------|-------------------------|
| L1            | Fresh    | Rural               |                         |
| L2            | Fresh    | Rural               |                         |
| L3            | Fresh    | Rural               | Tributary               |
| L4            | Brackish | Urban               |                         |
| L5            | Brackish | Urban               |                         |
| FS            | Brackish | Rural               | Fangshan River estuary  |
| S1            | Fresh    | Rural               | Reservoir               |
| S2            | Fresh    | Rural               |                         |
| S3            | Fresh    | Rural               | Tributary               |
| S4            | Fresh    | Rural               |                         |
| S5            | Fresh    | Rural               |                         |
| S6            | Brackish | Urban               | Estuary                 |
| B1            | Fresh    | Rural               |                         |
| B2            | Fresh    | Rural               |                         |
| B3            | Fresh    | Suburban            | Tributary               |
| B4            | Brackish | Suburban            | Estuary                 |
| W1            | Fresh    | Rural               |                         |
| W2            | Fresh    | Rural               |                         |
| W3            | Fresh    | Rural               |                         |
| W4            | Fresh    | Urban               |                         |
| W5            | Fresh    | Urban               |                         |
| W6            | Fresh    | Suburban            |                         |
| W7            | Fresh    | Urban               |                         |
| W8            | Fresh    | Suburban            |                         |
| W9            | Fresh    | Suburban            |                         |
| Nanwan WWTPs  | Waste    | Domestic and resort | Influents and effluents |
| Kenting WWTPs | Waste    | Domestic and resort | Influents and effluents |
| K1            | Brackish | Rural               | River estuary           |
| K2            | Fresh    | Rural/Resort        | River estuary           |
| K3            | Fresh    | Rural/Resort        | River estuary           |

**Table S3.** Characteristics of the two investigated wastewater treatment plants (WWTPs) in the Kenting area.

| WWTP    | Type of wastewater     | Type of treatment   | Disinfection method | Flow rate (m <sup>3</sup> /d) |
|---------|------------------------|---------------------|---------------------|-------------------------------|
| Nanwan  | Domestic and touristic | Primary + Secondary | -                   | 2000                          |
| Kenting | Domestic and touristic | Primary + Secondary | Chlorination        | 1500                          |



**Table S4.** Gradient elution program of chromatographic separation.**Method 1**

|                       |                                                                        |       |
|-----------------------|------------------------------------------------------------------------|-------|
| Eluent                | Mobile phase A: 0.1% formic acid and 5 mM ammonium acetate in DI water |       |
|                       | Mobile phase B: 0.1% formic acid in methanol                           |       |
| Flow rate: 1.0 mL/min |                                                                        |       |
| Time (min)            | Mobile phase                                                           |       |
|                       | A (%)                                                                  | B (%) |
| 0.0                   | 100                                                                    | 0     |
| 0.5                   | 60                                                                     | 40    |
| 3.0                   | 30                                                                     | 70    |
| 7.5                   | 5                                                                      | 95    |
| 11                    | 5                                                                      | 95    |
| 12                    | 100                                                                    | 0     |
| 15                    | 100                                                                    | 0     |

**Method 2**

|                            |                                                  |       |
|----------------------------|--------------------------------------------------|-------|
| Eluent                     | Mobile phase A: 0.1% formic acid in DI water     |       |
|                            | Mobile phase B: 0.1% formic acid in acetonitrile |       |
| Flow rate: 300 $\mu$ L/min |                                                  |       |
| Time (min)                 | Mobile phase                                     |       |
|                            | A (%)                                            | B (%) |
| 0.0                        | 90                                               | 10    |
| 6.0                        | 5                                                | 95    |
| 9.0                        | 5                                                | 95    |
| 10                         | 90                                               | 10    |
| 15                         | 90                                               | 10    |

**Table S5.** HPLC-MS/MS operation parameters.

| Ionization Mode                               | ESI Positive Mode | ESI Negative Mode |
|-----------------------------------------------|-------------------|-------------------|
| Dwell time                                    | 200 ms            | 200 ms            |
| Ion spray voltage (IS)                        | 5.0 kV            | -5.0 kV           |
| Curtain gas (CUR)                             | 10 L/h            | 10 L/h            |
| Gas 1 (GS1)                                   | 60L/h             | 60 L/h            |
| Gas 2 (GS2)                                   | 50 L/h            | 50 L/h            |
| Temperature (TEM)                             | 550°C             | 550°C             |
| Interface heater (IHE)                        | ON                | ON                |
| Collisionally activated<br>dissociation (CAD) | 7                 | 7                 |

**Table S6.** The 30 EC compounds, their MRM pairs, recoveries in deionized (DI) water and river water, wastewater, and limits of quantification (LOQ).

| Chemical            | LOQ (ng/L) |       |            |            | MRM1<br>(quantification) | MRM2<br>(confirmation) | Recovery (%) ± SD (n=12) |             |             |
|---------------------|------------|-------|------------|------------|--------------------------|------------------------|--------------------------|-------------|-------------|
|                     | DI         | River | Wastewater | Wastewater |                          |                        | DI water                 | River water | Wastewater  |
|                     | water      | water | (influent) | (effluent) |                          |                        |                          |             |             |
| Analgesics          |            |       |            |            |                          |                        |                          |             |             |
| Acetaminophen       | 1          | 5     | 5.5        | 6.5        | 152/110                  | 152/93                 | 101 ± 13                 | 102.0 ± 5.2 | 105.3 ± 9.7 |
| Diclofenac          | 1          | 2.5   | 2.8        | 4          | 294/250                  | 294/214                | 91.3 ± 3.6               | 94.0 ± 5.7  | 83.8 ± 9.3  |
| Ibuprofen           | 2          | 5     | 5.5        | 6.5        | 205/161                  | 205/158                | 102.0 ± 5.2              | 96.0 ± 3.9  | 104 ± 12    |
| Ketoprofen          | 3          | 10    | 10         | 10         | 252/209                  | —                      | 99.8 ± 7.1               | 98.0 ± 8.1  | 89 ± 10     |
| Naproxen            | 2.5        | 2.5   | 5.2        | 6          | 228/169                  | 228/184                | 96.0 ± 6.3               | 92.0 ± 5.5  | 85.6 ± 9.5  |
| Salicylic acid      | 2          | 2.5   | 5.5        | 6          | 136/65                   | 136/93                 | 99.0 ± 8.5               | 92.0 ± 4.4  | 87.7 ± 8.5  |
| Codeine (opioids)   | 0.25       | 0.5   | 3          | 5          | 300/153                  | 300/215                | 100.4 ±7.8               | 97.0 ± 9.7  | 101 ± 14    |
| Antibiotics         |            |       |            |            |                          |                        |                          |             |             |
| Sulfamethoxazole    | 0.5        | 1     | 3          | 5          | 254/156                  | 254/92                 | 106.0 ± 7.5              | 103.8 ± 7.0 | 87 ± 15     |
| Ampicillin          | 1          | 5     | 5.5        | 5.5        | 350/160                  | 350/333                | 99.2 ± 8.9               | 97 ± 10     | 95 ± 12     |
| Tetracycline        | 2          | 5     | 5.5        | 7          | 445/154                  | 445/410                | 82.5 ± 9.6               | 83.5 ± 9.8  | 69 ± 13     |
| Erythromycin–H2O    | 1          | 1     | 3          | 4.5        | 734/576                  | 734/158                | 90.5 ± 8.2               | 92.8 ± 8.3  | 92 ± 12     |
| Lipid regulator     |            |       |            |            |                          |                        |                          |             |             |
| Clofibric acid      | 0.5        | 1     | 5.2        | 5.5        | 213/126                  | 213/91                 | 91.4 ± 7.2               | 90.5 ± 7.1  | 91 ± 13     |
| Gemfibrozil         | 0.5        | 1     | 2          | 3.5        | 248/121                  | 248/126                | 90.7 ± 8.5               | 86.1 ± 6.6  | 81 ± 12     |
| β-blockers          |            |       |            |            |                          |                        |                          |             |             |
| Atenolol            | 2          | 5     | 5.5        | 6          | 267/190                  | 267/179                | 82.5 ± 10.6              | 86.1 ± 5.6  | 88 ± 14     |
| Antiepileptic drugs |            |       |            |            |                          |                        |                          |             |             |
| Carbamazepine       | 1          | 2.5   | 5          | 5.5        | 237/194                  | 237/179                | 90.8 ± 9.4               | 94.3 ± 7.6  | 128 ± 15    |
| Antidepressants     |            |       |            |            |                          |                        |                          |             |             |
| Fluoxetine          | 2.5        | 5     | 5.5        | 6.5        | 310/148                  | —                      | 86.2 ± 8.9               | 90.8 ± 6.3  | 91 ± 10     |
| Caffeine            | 0.5        | 0.5   | 2          | 3.2        | 195/138                  | 195/110                | 97.4 ± 7.3               | 115.3 ± 8.1 | 112 ± 11    |

**Ulcer healing**

|            |   |   |   |     |         |         |            |            |         |
|------------|---|---|---|-----|---------|---------|------------|------------|---------|
| Omeprazole | 1 | 1 | 2 | 3.5 | 346/197 | 346/179 | 79.4 ± 4.6 | 83.4 ± 4.5 | 83 ± 10 |
|------------|---|---|---|-----|---------|---------|------------|------------|---------|

**UV filters**

|                |     |   |     |     |         |   |            |             |            |
|----------------|-----|---|-----|-----|---------|---|------------|-------------|------------|
| Benzophenone–3 | 2.5 | 5 | 5.5 | 6.5 | 226/211 | – | 95.3 ± 5.7 | 102.0 ± 9.7 | 90.8 ± 8.3 |
|----------------|-----|---|-----|-----|---------|---|------------|-------------|------------|

|                |   |   |   |     |         |         |             |            |            |
|----------------|---|---|---|-----|---------|---------|-------------|------------|------------|
| Benzophenone–4 | 2 | 1 | 4 | 5.5 | 306/291 | 306/211 | 101.2 ± 7.5 | 99.5 ± 9.4 | 89.3 ± 9.2 |
|----------------|---|---|---|-----|---------|---------|-------------|------------|------------|

**Illicit drugs/controlled substances\***

|             |      |      |   |   |         |        |             |             |            |
|-------------|------|------|---|---|---------|--------|-------------|-------------|------------|
| Amphetamine | 0.05 | 0.07 | 1 | 2 | 136/119 | 136/91 | 107.2 ± 9.1 | 105.3 ± 6.7 | 95.8 ± 9.4 |
|-------------|------|------|---|---|---------|--------|-------------|-------------|------------|

|                 |     |   |   |   |         |        |             |             |             |
|-----------------|-----|---|---|---|---------|--------|-------------|-------------|-------------|
| Methamphetamine | 0.5 | 2 | 3 | 5 | 150/119 | 150/91 | 106.0 ± 5.1 | 106.3 ± 3.3 | 102.0 ± 9.7 |
|-----------------|-----|---|---|---|---------|--------|-------------|-------------|-------------|

|         |      |      |   |     |         |        |             |             |             |
|---------|------|------|---|-----|---------|--------|-------------|-------------|-------------|
| Cocaine | 0.05 | 0.05 | 1 | 2.5 | 304/182 | 304/82 | 104.0 ± 9.5 | 104.2 ± 2.2 | 106.7 ± 9.3 |
|---------|------|------|---|-----|---------|--------|-------------|-------------|-------------|

|        |      |      |   |     |         |         |             |             |         |
|--------|------|------|---|-----|---------|---------|-------------|-------------|---------|
| Heroin | 0.04 | 0.04 | 1 | 2.5 | 370/268 | 370/210 | 108.0 ± 9.4 | 109.4 ± 5.0 | 82 ± 10 |
|--------|------|------|---|-----|---------|---------|-------------|-------------|---------|

|           |      |      |     |     |         |         |             |            |          |
|-----------|------|------|-----|-----|---------|---------|-------------|------------|----------|
| Ketamine* | 0.25 | 0.25 | 2.5 | 3.5 | 238/219 | 238/125 | 103.0 ± 8.1 | 97.6 ± 7.5 | 103 ± 11 |
|-----------|------|------|-----|-----|---------|---------|-------------|------------|----------|

|                 |      |     |   |   |         |         |            |            |             |
|-----------------|------|-----|---|---|---------|---------|------------|------------|-------------|
| Pseudoephedrine | 0.25 | 0.5 | 1 | 3 | 166/148 | 166/133 | 95.5 ± 4.5 | 97.7 ± 3.5 | 108.2 ± 9.4 |
|-----------------|------|-----|---|---|---------|---------|------------|------------|-------------|

|            |      |   |   |     |         |         |            |            |         |
|------------|------|---|---|-----|---------|---------|------------|------------|---------|
| Cannabinol | 0.25 | 1 | 2 | 3.5 | 309/279 | 309/171 | 97.2 ± 6.3 | 97.4 ± 5.7 | 94 ± 12 |
|------------|------|---|---|-----|---------|---------|------------|------------|---------|

|                |   |   |   |     |         |         |             |             |         |
|----------------|---|---|---|-----|---------|---------|-------------|-------------|---------|
| Flunitrazepam* | 1 | 1 | 2 | 3.5 | 314/267 | 314/239 | 100.5 ± 7.2 | 103.8 ± 5.3 | 88 ± 14 |
|----------------|---|---|---|-----|---------|---------|-------------|-------------|---------|

3,4–

|                                         |      |      |   |   |         |         |             |             |         |
|-----------------------------------------|------|------|---|---|---------|---------|-------------|-------------|---------|
| Methylenedioxymethamphetamine<br>(MDMA) | 0.05 | 0.05 | 2 | 3 | 194/163 | 194/104 | 101.0 ± 8.2 | 107.3 ± 6.5 | 98 ± 13 |
|-----------------------------------------|------|------|---|---|---------|---------|-------------|-------------|---------|

|                           |     |   |   |     |        |        |            |             |         |
|---------------------------|-----|---|---|-----|--------|--------|------------|-------------|---------|
| Gamma–Hydroxybutyric acid | 0.5 | 1 | 2 | 2.5 | 103/85 | 103/57 | 95.7 ± 6.7 | 109.0 ± 7.2 | 83 ± 12 |
|---------------------------|-----|---|---|-----|--------|--------|------------|-------------|---------|

**Table S7.** Summary of EC concentrations in river waters in this study (ng/L).

| Chemicals                     | Concentration of ECs (ng/L) |        |      |                |        |      |             |        |      |                |        |       |              |        |      |                |        |      |
|-------------------------------|-----------------------------|--------|------|----------------|--------|------|-------------|--------|------|----------------|--------|-------|--------------|--------|------|----------------|--------|------|
|                               | Linbian River               |        |      | Sihchong River |        |      | Baoli River |        |      | Wangsha Stream |        |       | Kenting area |        |      | Fangshan river |        |      |
|                               | n=5                         |        |      | n=6            |        |      | n=4         |        |      | n=9            |        |       | n=3          |        |      | n=1            |        |      |
|                               | %                           | Median | Max  | %              | Median | Max  | %           | Median | Max  | %              | Median | Max   | %            | Median | Max  | %              | Median | Max  |
| <b>Analgesics</b>             |                             |        |      |                |        |      |             |        |      |                |        |       |              |        |      |                |        |      |
| Acetaminophen                 | 33                          | <5     | 101  | 52             | 10.4   | 537  | 33          | <5     | 147  | 38             | <5     | 510   | 17           | <5     | 37.7 | 50             | <5     | 350  |
| Diclofenac                    | 17                          | <2.5   | 5    | 0              | <2.5   | 0    | 8           | <2.5   | 16.4 | 44             | <2.5   | 92.7  | 67           | 7.15   | 23.9 | 13             | <2.5   | 6.6  |
| Ibuprofen                     | 22                          | <5     | 52   | 10             | <5     | 11.5 | 50          | <5     | 222  | 68             | 23.9   | 440   | 67           | 113    | 523  | 25             | <5     | 159  |
| Ketoprofen                    | 56                          | <10    | 487  | 5              | <10    | 16.4 | 25          | <10    | 34.3 | 47             | <10    | 222   | 67           | 23.4   | 61.3 | 38             | <10    | 79.3 |
| Naproxen                      | 11                          | <2.5   | 12.8 | 0              | <2.5   | 0    | 25          | <2.5   | 8.2  | 32             | <2.5   | 74.3  | 67           | 28.4   | 64.3 | 13             | <2.5   | 31.5 |
| Salicylic acid                | 17                          | <2.5   | 34   | 24             | <2.5   | 13   | 58          | 3      | 7.4  | 38             | <2.5   | 12.8  | 17           | <2.5   | 4    | 25             | <2.5   | 9.9  |
| Codeine (opioids)             | 44                          | <0.5   | 1623 | 52             | 0.7    | 863  | 50          | 11.8   | 2747 | 79             | 52.9   | 1690  | 83           | 37.1   | 1640 | 63             | 5      | 1393 |
| <b>Antibiotics</b>            |                             |        |      |                |        |      |             |        |      |                |        |       |              |        |      |                |        |      |
| Sulfamethoxazole              | 61                          | 26.3   | 967  | 29             | <1     | 18.4 | 42          | <1     | 58.3 | 44             | <1     | 197.7 | 50           | 1.7    | 227  | 25             | <1     | 268  |
| Ampicillin                    | 61                          | 8.5    | 163  | 67             | 13.1   | 46   | 100         | 15.6   | 76   | 100            | 24.9   | 96.3  | 83           | 10.25  | 62   | 25             | <5     | 45.7 |
| Tetracycline                  | 50                          | <5     | 21.1 | 38             | <5     | 15.8 | 42          | <5     | 33.3 | 21             | <5     | 30.7  | 17           | <5     | 47   | 38             | <5     | 11.2 |
| Erythromycin–H <sub>2</sub> O | 28                          | <1     | 627  | 5              | <1     | 1.6  | 50          | <1     | 303  | 44             | <1     | 247.7 | 50           | 25.4   | 296  | 13             | <1     | 10.7 |
| <b>Caffeine</b>               | 61                          | 6.2    | 236  | 62             | 4.3    | 130  | 50          | 4.55   | 533  | 71             | 179    | 2153  | 83           | 88.4   | 1237 | 25             | <0.5   | 637  |
| <b>Other pharmaceuticals</b>  |                             |        |      |                |        |      |             |        |      |                |        |       |              |        |      |                |        |      |
| Clofibric acid                | 44                          | <1     | 28.4 | 19             | <1     | 3.7  | 25          | <1     | 20.4 | 50             | <1     | 22.5  | 67           | 7.6    | 17.6 | 25             | <1     | 9.2  |
| Gemfibrozil                   | 33                          | <1     | 55   | 33             | <1     | 16.5 | 25          | <1     | 105  | 68             | 8.45   | 1513  | 50           | 1.5    | 328  | 25             | <1     | 175  |
| Atenolol                      | 22                          | <5     | 51   | 29             | <5     | 32.4 | 42          | <5     | 54.7 | 62             | 10.9   | 175   | 50           | 8.15   | 87.3 | 25             | <5     | 117  |

| Chemicals                                   | Concentration of ECs (ng/L) |        |       |                |        |       |             |        |       |                |        |       |              |        |       |                |        |       |
|---------------------------------------------|-----------------------------|--------|-------|----------------|--------|-------|-------------|--------|-------|----------------|--------|-------|--------------|--------|-------|----------------|--------|-------|
|                                             | Linbian River               |        |       | Sihchong River |        |       | Baoli River |        |       | Wangsha Stream |        |       | Kenting area |        |       | Fangshan river |        |       |
|                                             | n=5                         |        |       | n=6            |        |       | n=4         |        |       | n=9            |        |       | n=3          |        |       | n=1            |        |       |
|                                             | %                           | Median | Max   | %              | Median | Max   | %           | Median | Max   | %              | Median | Max   | %            | Median | Max   | %              | Median | Max   |
| Carbamazepine                               | 72                          | 4.1    | 183   | 71             | 5.4    | 40.3  | 67          | 5.7    | 38    | 53             | 7      | 81.3  | 33           | <2.5   | 48.3  | 50             | <2.5   | 44.7  |
| Fluoxetine                                  | 0                           | <5     | <5    | 0              | <5     | <5    | 0           | <5     | <5    | 0              | <5     | <5    | 0            | <5     | <5    | 0              | <5     | <5    |
| Omeprazole                                  | 11                          | <1     | 1.3   | 10             | <1     | 1.3   | 17          | <1     | 2.9   | 18             | <1     | 7     | 0            | <1     | <1    | 0              | <1     | <1    |
| <b>UV filters</b>                           |                             |        |       |                |        |       |             |        |       |                |        |       |              |        |       |                |        |       |
| Benzophenone—3                              | 0                           | <5     | <5    | 0              | <5     | <5    | 0           | <5     | <5    | 0              | <5     | <5    | 0            | <5     | <5    | 0              | <5     | <5    |
| Benzophenone—4                              | 6                           | <1     | 8.4   | 10             | <1     | 10.5  | 8           | <1     | 11.6  | 35             | <1     | 30.6  | 50           | 2.35   | 57.3  | 25             | <1     | 3.6   |
| <b>Illicit drugs/controlled substances*</b> |                             |        |       |                |        |       |             |        |       |                |        |       |              |        |       |                |        |       |
| Amphetamine                                 | 28                          | <0.07  | 1.9   | 14             | <0.07  | 0.2   | 8           | <0.07  | 3.3   | 6              | <0.07  | 90.3  | 33           | <0.07  | 11.2  | 13             | <0.07  | 0.3   |
| Methamphetamine                             | 6                           | <2     | 4.5   | 0              | <2     | 0     | 0           | <2     | 0     | 32             | <2     | 917   | 50           | 2.7    | 10.2  | 25             | <2     | 5.3   |
| Cocaine                                     | 0                           | <0.05  | <0.05 | 0              | <0.05  | <0.05 | 0           | <0.05  | <0.05 | 0              | <0.05  | <0.05 | 0            | <0.05  | <0.05 | 0              | <0.05  | <0.05 |
| Heroin                                      | 0                           | <0.04  | <0.04 | 0              | <0.04  | <0.04 | 0           | <0.04  | <0.04 | 0              | <0.04  | <0.04 | 0            | <0.04  | <0.04 | 0              | <0.04  | <0.04 |
| Ketamine*                                   | 33                          | <0.25  | 226   | 10             | <0.25  | 413   | 42          | <0.25  | 917   | 62             | 29.6   | 9000  | 67           | 286    | 9533  | 25             | <0.25  | 850   |
| Pseudoephedrine                             | 44                          | <0.5   | 817   | 38             | <0.5   | 247   | 50          | 1.75   | 3,293 | 79             | 33.2   | 3733  | 83           | 89.9   | 2193  | 25             | <0.5   | 1907  |
| Cannabinol                                  | 0                           | <1     | 0     | 0              | <1     | 0     | 0           | <1     | 0     | 0              | <1     | 0     | 0            | <1     | 0     | 0              | <1     | 0     |
| FM2*                                        | 22                          | <1     | 14.5  | 0              | <1     | 0     | 25          | <1     | 22.1  | 21             | <1     | 11.8  | 33           | <1     | 5     | 13             | <1     | 1.4   |
| MDMA                                        | 11                          | <0.05  | 5.6   | 0              | <0.05  | 0     | 17          | <0.05  | 14.9  | 21             | <0.05  | 667   | 33           | <0.05  | 1023  | 13             | <0.05  | 165   |
| GHB                                         | 28                          | <1     | 6.7   | 24             | <1     | 2.8   | 17          | <1     | 3.5   | 12             | <1     | 6     | 0            | <1     | 0     | 25             | <1     | 2.7   |

?: Detection frequency.

n: amount of sampling sites.

**Table S8.** The detection frequency and concentration rank of ECs in river waters.

| Rank <sup>a</sup> | Chemicals                     | %  | Rank <sup>b</sup> | Chemicals                     | Concentration (ng/L) |        |
|-------------------|-------------------------------|----|-------------------|-------------------------------|----------------------|--------|
|                   |                               |    |                   |                               | Max                  | Median |
| 1                 | Ampicillin                    | 79 | 1                 | Ketamine                      | 9,533                | <0.25  |
| 2                 | Codeine                       | 63 | 2                 | Pseudoephedrine               | 3,733                | 3.1    |
| 3                 | Caffeine                      | 62 | 3                 | Codeine                       | 2,747                | 20.8   |
| 4                 | Carbamazepine                 | 61 | 4                 | Caffeine                      | 2,153                | 24.3   |
| 5                 | Pseudoephedrine               | 57 | 5                 | Gemfibrozil                   | 1,513                | <1     |
| 6                 | Gemfibrozil                   | 44 | 6                 | MDMA                          | 1,023                | <0.05  |
| 7                 | Sulfamethoxazole              | 42 | 7                 | Sulfamethoxazole              | 967                  | <1     |
| 8                 | Ibuprofen                     | 41 | 8                 | Methamphetamine               | 917                  | <2     |
| 8                 | Atenolol                      | 41 | 9                 | Erythromycin-H <sub>2</sub> O | 627                  | <1     |
| 10                | Ketamine                      | 40 | 10                | Acetaminophen                 | 537                  | <5     |
| 11                | Acetaminophen                 | 39 | 11                | Ibuprofen                     | 523                  | <5     |
| 12                | Clofibric acid                | 38 | 12                | Ketoprofen                    | 487                  | <10    |
| 13                | Ketoprofen                    | 37 | 13                | Carbamazepine                 | 183                  | 4.6    |
| 14                | Tetracycline                  | 33 | 14                | Atenolol                      | 175                  | <5     |
| 15                | Salicylic acid                | 31 | 15                | Ampicillin                    | 163                  | 16.7   |
| 15                | Erythromycin-H <sub>2</sub> O | 31 | 16                | Diclofenac                    | 92.7                 | <2.5   |
| 17                | Diclofenac                    | 24 | 17                | Amphetamine                   | 90.3                 | <0.07  |
| 18                | Naproxen                      | 21 | 18                | Naproxen                      | 74.3                 | <2.5   |
| 18                | Benzophenone-4                | 21 | 19                | Benzophenone-4                | 57.3                 | <1     |
| 20                | GHB                           | 18 | 20                | Tetracycline                  | 47                   | <5     |
| 21                | Methamphetamine               | 17 | 21                | Salicylic acid                | 34                   | <2.5   |

|    |                |    |    |                  |       |       |
|----|----------------|----|----|------------------|-------|-------|
| 21 | FM2            | 17 | 22 | Clofibrilic acid | 28.4  | <1    |
| 23 | Amphetamine    | 14 | 23 | FM2              | 22.1  | <1    |
| 23 | MDMA           | 14 | 24 | Omeprazole       | 7     | <1    |
| 25 | Omeprazole     | 12 | 25 | GHB              | 6.7   | <1    |
| 26 | Heroin         | 0  | -  | Cocaine          | <0.05 | <0.05 |
| 26 | Cocaine        | 0  | -  | Heroin           | <0.04 | <0.04 |
| 26 | Fluoxetine     | 0  | -  | Fluoxetine       | <5    | <5    |
| 26 | Benzophenone-3 | 0  | -  | Benzophenone-3   | <5    | <5    |
| 26 | Cannabinol     | 0  | -  | Cannabinol       | <1    | <1    |

<sup>a</sup> Rank by detection frequency; <sup>b</sup> Rank by maximum concentration



**Table S9.** Summary of EC concentrations in wastewaters in two WWTPs (ng/L).

| Chemicals                     | Nanwan WWTPs    |        |       |       |                 |        |       |       |
|-------------------------------|-----------------|--------|-------|-------|-----------------|--------|-------|-------|
|                               | Influent (n=11) |        |       |       | Effluent (n=11) |        |       |       |
|                               | Frequency       | Median | Max   | Min   | Frequency       | Median | Max   | Min   |
| <b>Analgesics</b>             |                 |        |       |       |                 |        |       |       |
| Acetaminophen                 | 100             | 5,200  | 6,700 | 137   | 71              | 151    | 8,433 | <5.5  |
| Diclofenac                    | 100             | 65.7   | 105   | 42.7  | 100             | 105    | 113   | 58.7  |
| Ibuprofen                     | 100             | 1,083  | 1,500 | 430   | 100             | 620    | 917   | 250   |
| Ketoprofen                    | 0               | <10    | <10   | <10   | 43              | <10    | 49    | <10   |
| Naproxen                      | 14              | <5.2   | 84.7  | <5.2  | 100             | 35     | 79.7  | 15.9  |
| Salicylic acid                | 43              | <5.5   | 9.5   | <5.5  | 0               | <5.5   | <5.5  | <5.5  |
| Codeine (opioids)             | 100             | 3,180  | 3,967 | 2,207 | 100             | 2,227  | 2,837 | 1,777 |
| <b>Antibiotics</b>            |                 |        |       |       |                 |        |       |       |
| Sulfamethoxazole              | 100             | 477    | 1,280 | 122   | 100             | 353    | 493   | 143   |
| Ampicillin                    | 100             | 128    | 141   | 75.7  | 100             | 122    | 162   | 104   |
| Tetracycline                  | 71              | 207    | 507   | <5.5  | 43              | <5.5   | 637   | <5.5  |
| Erythromycin-H <sub>2</sub> O | 86              | 246    | 587   | <3    | 100             | 151    | 1463  | 130   |
| <b>Caffeine</b>               |                 |        |       |       |                 |        |       |       |
| Caffeine                      | 71              | 4,233  | 5,567 | <2    | 71              | 2,500  | 3,367 | <2    |
| <b>Other pharmaceuticals</b>  |                 |        |       |       |                 |        |       |       |
| Clofibric acid                | 0               | <5.2   | <5.2  | <5.2  | 0               | <5.2   | <5.2  | <5.2  |
| Gemfibrozil                   | 100             | 943    | 2,400 | 377   | 100             | 367    | 600   | 189   |
| Atenolol                      | 100             | 235    | 623   | 190   | 100             | 133    | 460   | 100   |
| Carbamazepine                 | 100             | 31.4   | 87    | 28.7  | 86              | 66     | 77.3  | <5    |

|                               |     |        |         |        |     |        |        |       |
|-------------------------------|-----|--------|---------|--------|-----|--------|--------|-------|
| Fluoxetine                    | 86  | 6.1    | 21.9    | <5.5   | 100 | 5.5    | 11.7   | <5.5  |
| Omeprazole                    | 100 | 122    | 164     | 109    | 86  | 80.7   | 138    | <2    |
| <b>Personal care products</b> |     |        |         |        |     |        |        |       |
| Benzophenone–3                | 0   | <5.5   | <5.5    | <5.5   | 0   | <5.5   | <5.5   | <5.5  |
| Benzophenone–4                | 0   | <4     | <4      | <4     | 14  | <4     | 14.7   | <4    |
| <b>Illicit drugs</b>          |     |        |         |        |     |        |        |       |
| Amphetamine                   | 100 | 40.7   | 83.7    | 5.2    | 100 | 6.6    | 20.1   | 3.6   |
| Methamphetamine               | 100 | 164    | 557     | 90.3   | 100 | 119    | 148    | 60.7  |
| Cocaine                       | 86  | 14.1   | 51.7    | <1     | 86  | 2.9    | 7.4    | <1    |
| Heroin                        | 0   | <1     | <1      | <1     | 29  | <1     | 3.1    | <1    |
| Ketamine                      | 100 | 18,633 | 138,000 | 8,033  | 100 | 14,733 | 39,333 | 4,300 |
| Pseudoephedrine               | 100 | 22,300 | 44,667  | 12,133 | 100 | 10,133 | 29,500 | 3,030 |
| Cannabinol                    | 0   | <2     | <2      | <2     | 0   | <2     | <2     | <2    |
| FM2                           | 71  | 21.9   | 28.8    | <2     | 100 | 27.9   | 36     | 24.3  |
| MDMA                          | 86  | 207    | 413     | <2     | 86  | 130    | 1267   | <2    |
| GHB                           | 86  | 3.9    | 5.5     | <2     | 100 | 2.9    | 3.5    | 2.1   |

**Table S9. (Continued).**

| Chemicals                     | Kenting WWTPs   |        |        |       |                 |        |       |      |
|-------------------------------|-----------------|--------|--------|-------|-----------------|--------|-------|------|
|                               | Influent (n=11) |        |        |       | Effluent (n=11) |        |       |      |
|                               | Frequency       | Median | Max    | Min   | Frequency       | Median | Max   | Min  |
| <b>Analgesics</b>             |                 |        |        |       |                 |        |       |      |
| Acetaminophen                 | 100             | 2,043  | 4,700  | 1,963 | 43              | <5.5   | 327   | <5.5 |
| Diclofenac                    | 100             | 68.3   | 77     | 38.7  | 86              | 25.9   | 36    | <2.8 |
| Ibuprofen                     | 100             | 563    | 790    | 291   | 86              | 337    | 420   | <5   |
| Ketoprofen                    | 0               | <10    | <10    | <10   | 86              | 32.1   | 49    | <10  |
| Naproxen                      | 43              | <5.2   | 6.8    | <5.2  | 86              | 38.7   | 52    | <5.2 |
| Salicylic acid                | 29              | <5.5   | 9.5    | <5.5  | 0               | <5.5   | <5.5  | <5.5 |
| Codeine (opioids)             | 100             | 2,277  | 2,473  | 2,103 | 100             | 1,123  | 1,403 | 703  |
| <b>Antibiotics</b>            |                 |        |        |       |                 |        |       |      |
| Sulfamethoxazole              | 100             | 210    | 259    | 82.3  | 86              | 115    | 209   | <3   |
| Ampicillin                    | 100             | 89.7   | 105    | 63    | 100             | 57.7   | 81    | 22.3 |
| Tetracycline                  | 14              | <5.5   | 207    | <5.5  | 29              | <5.5   | 108   | <5.5 |
| Erythromycin–H <sub>2</sub> O | 100             | 114    | 281    | 86.3  | 86              | 48     | 54    | <3   |
| <b>Caffeine</b>               |                 |        |        |       |                 |        |       |      |
|                               | 100             | 9,500  | 13,633 | 3,533 | 100             | 2,110  | 6,167 | 5.4  |
| <b>Other pharmaceuticals</b>  |                 |        |        |       |                 |        |       |      |
| Clofibric acid                | 0               | <5.2   | <5.2   | <5.2  | 86              | 6.7    | 12.3  | <5.2 |
| Gemfibrozil                   | 100             | 443    | 517    | 373   | 86              | 174    | 211   | <2   |
| Atenolol                      | 100             | 177    | 226    | 121   | 100             | 106    | 114   | 10.1 |
| Carbamazepine                 | 100             | 38.7   | 49.7   | 27.5  | 100             | 26.9   | 32.3  | 6    |

|                                             |     |        |        |        |     |       |       |      |
|---------------------------------------------|-----|--------|--------|--------|-----|-------|-------|------|
| Fluoxetine                                  | 100 | 10.3   | 18     | 5.7    | 86  | <5.5  | 5.6   | <5.5 |
| Omeprazole                                  | 100 | 72.3   | 78.7   | 61.3   | 86  | 47    | 59.3  | <2   |
| <b>UV filters</b>                           |     |        |        |        |     |       |       |      |
| Benzophenone–3                              | 57  | 5.8    | 13.3   | <5.5   | 0   | <5.5  | <5.5  | <5.5 |
| Benzophenone–4                              | 57  | 28.7   | 62     | <4     | 57  | 13.3  | 29.7  | <4   |
| <b>Illicit drugs/controlled substances*</b> |     |        |        |        |     |       |       |      |
| Amphetamine                                 | 100 | 32.6   | 53     | 25.3   | 86  | 4     | 7     | <1   |
| Methamphetamine                             | 100 | 81.3   | 106    | 61.7   | 86  | 14.9  | 20    | <3   |
| Cocaine                                     | 100 | 9.3    | 17.6   | 1.3    | 43  | <1    | 1.1   | <1   |
| Heroin                                      | 29  | <1     | 17.2   | <1     | 29  | <1    | 2.8   | <1   |
| Ketamine*                                   | 100 | 84,666 | 92,667 | 44,333 | 86  | 4,800 | 9,867 | <2.5 |
| Pseudoephedrine                             | 100 | 11,200 | 13,233 | 9,233  | 100 | 2,200 | 3,133 | 68.7 |
| Cannabinol                                  | 0   | <2     | <2     | <2     | 0   | <2    | <2    | <2   |
| FM2*                                        | 0   | <2     | <2     | <2     | 0   | <2    | <2    | <2   |
| MDMA                                        | 100 | 403    | 940    | 89.7   | 71  | 154   | 983   | <2   |
| GHB                                         | 57  | <2     | 3.4    | <2     | 100 | 3.2   | 4.8   | <2   |

n: amount of samples.

**Table S10.** Global comparison of EC concentrations in the aquatic environments in the present study (ng/L).

| Compounds                     | Asia            |           |                        |                        |          |                      |                        | Europe                |                       |                     | America                 |
|-------------------------------|-----------------|-----------|------------------------|------------------------|----------|----------------------|------------------------|-----------------------|-----------------------|---------------------|-------------------------|
|                               | Southern Taiwan |           | Northern Taiwan        |                        | Japan    | Korea                | China                  | UK                    | Italy                 | Spain               | USA                     |
|                               | River water     | WWTPs     | River water            | WWTPs                  |          |                      |                        |                       |                       |                     |                         |
| Acetaminophen                 | ND–537          | ND–8,433  | 8.3–9,170 <sup>a</sup> | ND–30,967 <sup>c</sup> | ND–263   | ND–73 <sup>e</sup>   |                        | ND–2,382 <sup>m</sup> |                       | ND–872 <sup>s</sup> | ND–10,000 <sup>w</sup>  |
| Diclofenac                    | ND–92.7         | ND–113    | ND–56.5 <sup>a</sup>   | 3–437 <sup>c</sup>     | ND–220   | 0.87–30 <sup>f</sup> | 17.6–150 <sup>h</sup>  | ND–261 <sup>m</sup>   | 247 <sup>δ</sup>      | ND–148 <sup>s</sup> | ND–177.1 <sup>*</sup>   |
| Ibuprofen                     | ND–523          | ND–1,500  | ND–4,350 <sup>a</sup>  | ND–17,933 <sup>c</sup> | ND–77    | 1.2–51 <sup>f</sup>  | 17.5–685 <sup>h</sup>  | ND–100 <sup>m</sup>   | 31,323 <sup>δ</sup>   | ND–541 <sup>s</sup> | ND–1,000 <sup>w</sup>   |
| Ketoprofen                    | ND–487          | ND–49     | ND–45 <sup>a</sup>     | ND–503 <sup>c</sup>    | ND–820   | ND–41 <sup>g</sup>   | ND–31.4 <sup>h</sup>   | ND–14 <sup>m</sup>    | 239 <sup>δ</sup>      | ND–                 |                         |
| Naproxen                      | ND–74.3         | ND–84.7   | ND–1,050 <sup>a</sup>  | ND–                    | 38–230   | 5.3–100 <sup>f</sup> | 20.9–125 <sup>h</sup>  | ND–146 <sup>m</sup>   | 2027 <sup>δ</sup>     | ND–109 <sup>s</sup> | ND–135.2 <sup>x</sup>   |
| Salicylic acid                | ND–34           | ND–9.5    |                        |                        |          | ND–148 <sup>g</sup>  | 66–14,736 <sup>h</sup> | ND–302 <sup>m</sup>   |                       |                     |                         |
| Codeine                       | ND–2,747        | 703–3,967 | ND–57 <sup>b</sup>     | 26–67 <sup>b</sup>     |          |                      |                        | ND–815 <sup>m</sup>   | 110–300 <sup>p</sup>  | ND–52 <sup>t</sup>  | ND–1,000 <sup>w</sup>   |
| Sulfamethoxazole              | ND–967          | ND–1,280  |                        | ND–1,760 <sup>c</sup>  | ND–160   | ND–36 <sup>e</sup>   | ND–940 <sup>j</sup>    | ND–4 <sup>m</sup>     | 1.8–11.4 <sup>q</sup> |                     | ND–520 <sup>w</sup>     |
| Ampicillin                    | ND–163          | 22.3–162  |                        | ND–650 <sup>c</sup>    |          |                      |                        |                       |                       |                     |                         |
| Tetracycline                  | ND–47           | ND–637    | 25–455 <sup>a</sup>    | ND–1,007 <sup>c</sup>  |          |                      | ND–320 <sup>k</sup>    |                       |                       |                     | ND–110 <sup>w</sup>     |
| Erythromycin–H <sub>2</sub> O | ND–627          | ND–1,463  |                        | 141–1,537 <sup>c</sup> |          | ND–4.8 <sup>e</sup>  | ND–121 <sup>j</sup>    | ND–351 <sup>m</sup>   | 9.7–30.5 <sup>q</sup> | ND–42 <sup>s</sup>  | ND–1,700 <sup>w</sup>   |
| Caffeine                      | ND–2,153        | ND–13,633 |                        | ND–23,345 <sup>c</sup> | ND–3,500 | 38–250 <sup>f</sup>  |                        | 437 <sup>n</sup>      | 39,813 <sup>δ</sup>   |                     | ND–6,000 <sup>w</sup>   |
| Clofibric acid                | ND–28.4         | ND–12.3   | 66.9–279 <sup>a</sup>  | ND–2,593 <sup>c</sup>  | ND–110   | ND–35 <sup>g</sup>   | 7.6–18.3 <sup>h</sup>  | ND–164 <sup>m</sup>   | 127 <sup>#</sup>      | ND–6.1 <sup>s</sup> | 3.2–26.7 <sup>x</sup>   |
| Gemfibrozil                   | ND–1,513        | ND–2,400  |                        | ND–1,378 <sup>c</sup>  |          | 0.25–13 <sup>f</sup> | 14.9–31.2 <sup>h</sup> |                       | 970 <sup>δ</sup>      | ND–212 <sup>s</sup> | ND–790 <sup>w</sup>     |
| Atenolol                      | ND–175          | 10.1–623  |                        | ND–2,260 <sup>d</sup>  | ND–930   | 2.4–150 <sup>f</sup> | ND–20 <sup>l</sup>     |                       |                       |                     |                         |
| Carbamazepine                 | ND–183          | ND–87     |                        | ND–10,933 <sup>d</sup> | ND–86    | 8.4–68 <sup>f</sup>  | 15.6–43.1 <sup>h</sup> | ND–684 <sup>m</sup>   | 81.5–348 <sup>r</sup> | ND–54 <sup>s</sup>  | 42.9–113.7 <sup>x</sup> |
| Benzophenone–3                | ND              | ND–13.3   |                        |                        |          |                      |                        | ND–44 <sup>m</sup>    | ND–306 <sup>φ</sup>   | ND–295 <sup>θ</sup> |                         |
| Benzophenone–4                | ND–57.3         | ND–62     |                        |                        |          |                      |                        | ND–371 <sup>m</sup>   | ND–1548 <sup>φ</sup>  |                     |                         |

|                        |          |             |                     |                      |  |                      |                       |                       |                      |
|------------------------|----------|-------------|---------------------|----------------------|--|----------------------|-----------------------|-----------------------|----------------------|
| <b>Amphetamine</b>     | ND–90.3  | ND–83.7     |                     |                      |  | ND–21 <sup>m</sup>   | ND–14.7 <sup>r</sup>  | ND–3.4 <sup>t</sup>   | ND <sup>z</sup>      |
|                        |          |             |                     |                      |  | ND–4.3 <sup>n</sup>  |                       | 1.6–11.8 <sup>u</sup> |                      |
| <b>Methamphetamine</b> | ND–917   | ND–557      | ND–405 <sup>b</sup> | ND–296 <sup>b</sup>  |  | ND <sup>n</sup>      | 3.5–16.2 <sup>r</sup> | ND–0.7 <sup>v</sup>   | ND–570 <sup>y</sup>  |
|                        |          |             |                     |                      |  |                      |                       | 0.3–0.7 <sup>u</sup>  | ND–62.6 <sup>z</sup> |
| <b>Cocaine</b>         | ND       | ND–51.7     | ND–0.7 <sup>b</sup> | 0.5–1.2 <sup>b</sup> |  | 14 <sup>n</sup>      | ND–421 <sup>r</sup>   | ND–11.6 <sup>u</sup>  |                      |
|                        |          |             |                     |                      |  |                      |                       | ND–59.2 <sup>v</sup>  |                      |
| <b>Heroin</b>          | ND       | ND–17.2     |                     |                      |  | ND <sup>n</sup>      |                       | ND <sup>t, u, v</sup> |                      |
| <b>Ketamine</b>        | ND–9,533 | ND–13,8000  | 50–341 <sup>b</sup> | 147–343 <sup>b</sup> |  | 51 <sup>n</sup>      |                       | ND–415 <sup>t</sup>   |                      |
| <b>Pseudoephedrine</b> | ND–3,733 | 68.7–4,4667 |                     |                      |  | ND–16.5 <sup>n</sup> |                       | 0.7–145 <sup>u</sup>  | ND–3300 <sup>y</sup> |
| <b>MDMA</b>            | ND–1,023 | ND–1,267    |                     |                      |  | ND–24.8 <sup>n</sup> | 4.4–14.2 <sup>r</sup> | ND–3.4 <sup>u</sup>   | ND–96 <sup>y</sup>   |
|                        |          |             |                     |                      |  |                      |                       | ND–11.8 <sup>v</sup>  |                      |
| <b>GHB</b>             | ND–6.7   | ND–5.5      |                     |                      |  |                      |                       |                       |                      |

|            |            |                    |     |                    |               |           |                     |                  |              |
|------------|------------|--------------------|-----|--------------------|---------------|-----------|---------------------|------------------|--------------|
| References | This study | (8); (10); (15-16) | (4) | (2); (38);<br>(39) | (21); (40-42) | (3); (43) | (44-46);<br>(55-57) | (47-50);<br>(58) | (5); (51-54) |
|------------|------------|--------------------|-----|--------------------|---------------|-----------|---------------------|------------------|--------------|

ND: not detected. <sup>2-5, 8, 10, 15, 16, 21, 38-58</sup>

<sup>a</sup> Data from Lin et al. (15); <sup>b</sup> Data from Lin et al. (8); <sup>c</sup> Data from Lin et al. (16); <sup>d</sup> Data from Lin et al. (10); <sup>e</sup> Data from Yoon et al. (2); <sup>f</sup> Data from Kim et al. (38); <sup>g</sup> Data from Sim et al. (39); <sup>h</sup> Data from Zhao et al. (21); <sup>i</sup> Data from Li et al. (40); <sup>k</sup> Data from Luo et al. (41); <sup>l</sup> Data from Chen et al. (42); <sup>m</sup> Data from Kasprzyk–Hordern et al. (3); <sup>n</sup> Data from Baker and Kasprzyk–Hordern (43); <sup>p</sup> Data from Repice et al. (44); <sup>q</sup> Data from Zuccato et al. (45); <sup>r</sup> Data from Castiglioni et al. (46); <sup>s</sup> Data from da Silva et al. (47); <sup>t</sup> Data from Vazquez–Roig et al. (48); <sup>u</sup> Data from Vazquez–Roig et al. (49); <sup>v</sup> Data from Postigo et al. (50); <sup>w</sup> Data from Kolpin et al. (5); <sup>x</sup> Data from Zhang et al. (51); <sup>y</sup> Data from Jones–Lepp et al. (52); <sup>z</sup> Data from Bartelt–Hunt et al. (53); \* Data from Spongberg and Witter (54). <sup>φ</sup> Data from Gago Ferrero et al. (55); <sup>δ</sup> Data from Loos et al. (56); <sup>#</sup> Data from Loos et al. (57). <sup>θ</sup> Data from Diaz-Cruz et al. (58).

**Table S11.** PCA loadings of the three principal components (PCs).

| Total variance explained      | PC1          | PC2          | PC3          |
|-------------------------------|--------------|--------------|--------------|
|                               | 30.9%        | 23.4%        | 11.8%        |
| Acetaminophen                 | <b>0.680</b> | 0.014        | 0.530        |
| Diclofenac                    | 0.350        | <b>0.753</b> | 0.207        |
| Ibuprofen                     | <b>0.751</b> | 0.305        | 0.377        |
| Ketoprofen                    | -0.085       | <b>0.530</b> | -0.028       |
| Naproxen                      | 0.010        | <b>0.639</b> | -0.066       |
| Salicylic acid                | 0.053        | -0.139       | -0.034       |
| Codeine                       | <b>0.650</b> | 0.470        | 0.290        |
| Sulfamethoxazole              | <b>0.873</b> | 0.194        | 0.113        |
| Ampicillin                    | 0.378        | <b>0.669</b> | 0.233        |
| Tetracycline                  | 0.328        | 0.129        | <b>0.812</b> |
| Erythromycin-H <sub>2</sub> O | 0.410        | <b>0.710</b> | 0.452        |
| Caffeine                      | <b>0.711</b> | 0.171        | 0.061        |
| Clofibric acid                | -0.060       | -0.061       | -0.029       |
| Gemfibrozil                   | <b>0.804</b> | 0.091        | 0.242        |
| Atenolol                      | <b>0.569</b> | 0.412        | 0.144        |
| Carbamazepine                 | 0.039        | <b>0.547</b> | 0.051        |
| Benzophenone-4                | -0.067       | <b>0.728</b> | 0.236        |
| Amphetamine                   | <b>0.514</b> | 0.026        | 0.108        |
| Methamphetamine               | <b>0.607</b> | 0.273        | 0.134        |
| Ketamine                      | <b>0.682</b> | 0.034        | 0.041        |
| Pseudoephedrine               | <b>0.777</b> | 0.138        | 0.449        |
| FM2                           | 0.186        | <b>0.740</b> | 0.431        |
| MDMA                          | <b>0.636</b> | 0.265        | 0.059        |

Extraction Method: Principal Component Analysis.

Rotation Method: Varimax with Kaiser Normalization.

**Table S12.** Predicted no-effect concentrations (PNECs) for the ECs examined in this study.

| <b>Substance</b>              | <b>PNEC (ng/L)</b> | <b>Reference</b> |
|-------------------------------|--------------------|------------------|
| Acetaminophen                 | 9200               | (19)             |
| Diclofenac                    | 100                | (11)             |
| Ibuprofen                     | 2000               | (21)             |
| Ketoprofen                    | 15600              | (16)             |
| Naproxen                      | 20000              | (11)             |
| Salicylic acid                | 60000              | (11)             |
| Codeine                       | 60                 | (10)             |
| Sulfamethoxazole              | 27                 | (13)             |
| Ampicillin                    | 75                 | (20)             |
| Tetracycline                  | 90                 | (20)             |
| Erythromycin-H <sub>2</sub> O | 40                 | (15)             |
| Caffeine                      | 10 <sup>7</sup>    | (20)             |
| Clofibric acid                | 1000               | (11)             |
| Gemfibrozil                   | 1000               | (21)             |
| Carbamazepine                 | 2500               | (11)             |
| Methamphetamine               | 2300               | (10)             |



## References

1. Thomas, K. V.; Bijlsma, L.; Castiglioni, S.; Covaci, A.; Emke, E.; Grabic, R.; Hernandez, F.; Karolak, S.; Kasprzyk-Hordern, B.; Lindberg, R. H.; de Alda, M. L.; Meierjohann, A.; Ort, C.; Pico, Y.; Quintana, J. B.; Reid, M.; Rieckermann, J.; Terzic, S.; van Nuijs, A. L. N.; de Voogt, P., Comparing illicit drug use in 19 European cities through sewage analysis. *Sci. Total Environ.* **2012**, *432*, 432-439.
2. Yoon, Y.; Ryu, J.; Oh, J.; Choi, B. G.; Snyder, S. A., Occurrence of endocrine disrupting compounds, pharmaceuticals, and personal care products in the Han River (Seoul, South Korea). *Sci. Total Environ.* **2010**, *408*, (3), 636-643.
3. Kasprzyk-Hordern, B.; Dinsdale, R. M.; Guwy, A. J., The occurrence of pharmaceuticals, personal care products, endocrine disruptors and illicit drugs in surface water in South Wales, UK. *Water Res.* **2008**, *42*, (13), 3498-3518.
4. Nakada, N.; Komori, K.; Suzuki, Y.; Konishi, C.; Houwa, I.; Tanaka, H., Occurrence of 70 pharmaceutical and personal care products in Tone River basin in Japan. *Water Sci. Technol.* **2007**, *56*, (12), 133-140.
5. Kolpin, D. W.; Furlong, E. T.; Meyer, M. T.; Thurman, E. M.; Zaugg, S. D.; Barber, L. B.; Buxton, H. T., Pharmaceuticals, hormones, and other organic wastewater contaminants in US streams, 1999-2000: A national reconnaissance. *Environ. Sci. Technol.* **2002**, *36*, (6), 1202-1211.
6. Zhu, S. C.; Chen, H.; Li, J. N., Sources, distribution and potential risks of pharmaceuticals and personal care products in Qingshan Lake basin, Eastern China. *Ecotox. Environ. Safe.* **2013**, *96*, 154-159.
7. Lin, A. Y. C.; Tsai, Y. T., Occurrence of pharmaceuticals in Taiwan's surface waters: Impact of waste streams from hospitals and pharmaceutical production facilities. *Sci. Total Environ.* **2009**, *407*, (12), 3793-3802.
8. Lin, A. Y. C.; Wang, X. H.; Lin, C. F., Impact of wastewaters and hospital effluents on the occurrence of controlled substances in surface waters. *Chemosphere* **2010**, *81*, (5), 562-570.
9. Jiang, J. J.; Lee, C. L.; Fang, M. D., Emerging organic contaminants in coastal waters: Anthropogenic impact, environmental release and ecological risk. *Mar. Pollut. Bull.* **2014**, *85*, 391-399.
10. Lin, A. Y.-C.; Yu, T.-H.; Lin, C.-F., Pharmaceutical contamination in residential, industrial, and agricultural waste streams: Risk to aqueous environments in Taiwan. *Chemosphere* **2008**, *74*, (1), 131-141.
11. Lin, A. Y. C.; Lee, W. N.; Wang, X. H., Ketamine and the metabolite norketamine: Persistence and phototransformation toxicity in hospital wastewater and surface water. *Water Res.* **2014**, *53*, 351-360.
12. Lin, A. Y. C.; Lin, C. A.; Tung, H. H.; Chary, N. S., Potential for biodegradation and sorption of acetaminophen, caffeine, propranolol and acebutolol in lab-scale aqueous environments. *J.*

*Hazard. Mater.* **2010**, *183*, (1-3), 242-250.

13. Lin, A. Y. C.; Lin, C. F.; Tsai, Y. T.; Lin, H. H. H.; Chen, J.; Wang, X. H.; Yu, T. H., Fate of selected pharmaceuticals and personal care products after secondary wastewater treatment processes in Taiwan. *Water Science and Technology* **2010**, *62*, (10), 2450-2458.
14. Lin, A. Y. C.; Lin, Y. C.; Lee, W. N., Prevalence and sunlight photolysis of controlled and chemotherapeutic drugs in aqueous environments. *Environ. Pollut.* **2014**, *187*, 170-181.
15. Lin, A. Y. C.; Panchangam, S. C.; Chen, H. Y., Implications of human pharmaceutical occurrence in the Sindian river of Taiwan: A strategic study of risk assessment. *J. Environ. Monit.* **2010**, *12*, (1), 261-270.
16. Lin, A. Y. C.; Tsai, Y. T.; Yu, T. H.; Wang, X. H.; Lin, C. F., Occurrence and fate of pharmaceuticals and personal care products in Taiwan's aquatic environment. *Desalin. Water Treat.* **2011**, *32*, (1-3), 57-64.
17. Wang, X. H.; Lin, A. Y. C., Is the phototransformation of pharmaceuticals a natural purification process that decreases ecological and human health risks? *Environ. Pollut.* **2014**, *186*, 203-215.
18. EMEA, Guideline on the environmental risk assessment of medicinal products for human use. *CPMP/SEP/4447/00 draft* **2005**, European Medicines Evaluation Agency.
19. Lee, Y. J.; Lee, S. E.; Lee, D. S.; Kim, Y. H., Risk assessment of human antibiotics in Korean aquatic environment. *Environ. Toxicol. Pharmacol.* **2008**, *26*, (2), 216-221.
20. van der Aa, M.; Bijlsma, L.; Emke, E.; Dijkman, E.; van Nuijs, A. L. N.; van de Ven, B.; Hernandez, F.; Versteegh, A.; de Voogt, P., Risk assessment for drugs of abuse in the Dutch watercycle. *Water Res.* **2013**, *47*, (5), 1848-1857.
21. Zhao, J. L.; Ying, G. G.; Liu, Y. S.; Chen, F.; Yang, J. F.; Wang, L.; Yang, X. B.; Stauber, J. L.; Warne, M. S., Occurrence and a screening-level risk assessment of human pharmaceuticals in the Pearl River system, South China. *Environ. Toxicol. Chem.* **2010**, *29*, (6), 1377-1384.
22. Hernando, M. D.; Mezcuca, M.; Fernandez-Alba, A. R.; Barcelo, D., Environmental risk assessment of pharmaceutical residues in wastewater effluents, surface waters and sediments. *Talanta* **2006**, *69*, (2), 334-342.
23. Ferrari, B.; Mons, R.; Vollat, B.; Frayssie, B.; Paxeus, N.; Lo Giudice, R.; Pollio, A.; Garric, J., Environmental risk assessment of six human pharmaceuticals: Are the current environmental risk assessment procedures sufficient for the protection of the aquatic environment? *Environ. Toxicol. Chem.* **2004**, *23*, (5), 1344-1354.
24. Grung, M.; Kallqvist, T.; Sakshaug, S.; Skurtveit, S.; Thomas, K. V., Environmental assessment of Norwegian priority pharmaceuticals based on the EMEA guideline. *Ecotox. Environ. Safe.* **2008**, *71*, (2), 328-340.
25. Isidori, M.; Lavorgna, M.; Nardelli, A.; Pascarella, L.; Parrella, A., Toxic and genotoxic evaluation of six antibiotics on non-target organisms. *Sci. Total Environ.* **2005**, *346*, (1-3), 87-98.
26. Santos, J. L.; Aparicio, I.; Alonso, E., Occurrence and risk assessment of pharmaceutically

- active compounds in wastewater treatment plants. A case study: Seville city (Spain). *Environ. Int.* **2007**, *33*, (4), 596-601.
27. Ying, G. G.; Kookana, R. S.; Kolpin, D. W., Occurrence and removal of pharmaceutically active compounds in sewage treatment plants with different technologies. *J. Environ. Monit.* **2009**, *11*, (8), 1498-1505.
28. European-Commission, Technical Guidance Document in Support of Commission Directive 93/67/EEC on Risk Assessment for New Notified Substances and Commission Regulation (EC) No 1488/94 on Risk Assessment for Existing Substances, Part II. Brussels, Belgium. **2003**.
29. Kim, Y.; Choi, K.; Jung, J. Y.; Park, S.; Kim, P. G.; Park, J., Aquatic toxicity of acetaminophen, carbamazepine, cimetidine, diltiazem and six major sulfonamides, and their potential ecological risks in Korea. *Environ. Int.* **2007**, *33*, (3), 370-375.
30. Wang, L.; Ying, G. G.; Zhao, J. L.; Yang, X. B.; Chen, F.; Tao, R.; Liu, S.; Zhou, L. J., Occurrence and risk assessment of acidic pharmaceuticals in the Yellow River, Hai River and Liao River of north China. *Sci. Total Environ.* **2010**, *408*, (16), 3139-3147.
31. Martin, J.; Camacho-Munoz, D.; Santos, J. L.; Aparicio, I.; Alonso, E., Occurrence of pharmaceutical compounds in wastewater and sludge from wastewater treatment plants: Removal and ecotoxicological impact of wastewater discharges and sludge disposal. *J. Hazard. Mater.* **2012**, *239*, 40-47.
32. Lindberg, R. H.; Wennberg, P.; Johansson, M. I.; Tysklind, M.; Andersson, B. A. V., Screening of human antibiotic substances and determination of weekly mass flows in five sewage treatment plants in Sweden. *Environ. Sci. Technol.* **2005**, *39*, (10), 3421-3429.
33. Senta, I.; Terzic, S.; Ahel, M., Occurrence and fate of dissolved and particulate antimicrobials in municipal wastewater treatment. *Water Res.* **2013**, *47*, (2), 705-714.
34. Heeb, F.; Singer, H.; Pernet-Coudrier, B.; Qi, W. X.; Liu, H. J.; Longree, P.; Muller, B.; Berg, M., Organic Micropollutants in Rivers Downstream of the Megacity Beijing: Sources and Mass Fluxes in a Large-Scale Wastewater Irrigation System. *Environ. Sci. Technol.* **2012**, *46*, (16), 8680-8688.
35. Gobel, A.; Mc Ardell, C. S.; Joss, A.; Siegrist, H.; Giger, W., Fate of sulfonamides, macrolides, and trimethoprim in different wastewater treatment technologies. *Sci. Total Environ.* **2007**, *372*, (2-3), 361-371.
36. Stackelberg, P. E.; Gibs, J.; Furlong, E. T.; Meyer, M. T.; Zaugg, S. D.; Lippincott, R. L., Efficiency of conventional drinking-water-treatment processes in removal of pharmaceuticals and other organic compounds. *Sci. Total Environ.* **2007**, *377*, (2-3), 255-272.
37. Nakada, N.; Tanishima, T.; Shinohara, H.; Kiri, K.; Takada, H., Pharmaceutical chemicals and endocrine disruptors in municipal wastewater in Tokyo and their removal during activated sludge treatment. *Water Res.* **2006**, *40*, (17), 3297-3303.
38. Kim, S. D.; Cho, J.; Kim, I. S.; Vanderford, B. J.; Snyder, S. A., Occurrence and removal of pharmaceuticals and endocrine disruptors in South Korean surface, drinking, and waste waters.

*Water Res.* **2007**, *41*, (5), 1013-1021.

39. Sim, W. J.; Lee, J. W.; Oh, J. E., Occurrence and fate of pharmaceuticals in wastewater treatment plants and rivers in Korea. *Environ. Pollut.* **2010**, *158*, (5), 1938-1947.
40. Li, W. H.; Shi, Y. L.; Gao, L. H.; Liu, J. M.; Cai, Y. Q., Occurrence of antibiotics in water, sediments, aquatic plants, and animals from Baiyangdian Lake in North China. *Chemosphere* **2012**, *89*, (11), 1307-1315.
41. Luo, Y.; Xu, L.; Rysz, M.; Wang, Y. Q.; Zhang, H.; Alvarez, P. J. J., Occurrence and Transport of Tetracycline, Sulfonamide, Quinolone, and Macrolide Antibiotics in the Haihe River Basin, China. *Environ. Sci. Technol.* **2011**, *45*, (5), 1827-1833.
42. Chen, H.; Li, X. J.; Zhu, S. C., Occurrence and distribution of selected pharmaceuticals and personal care products in aquatic environments: a comparative study of regions in China with different urbanization levels. *Environ. Sci. Pollut. Res.* **2012**, *19*, (6), 2381-2389.
43. Baker, D. R.; Kasprzyk-Hordern, B., Multi-residue analysis of drugs of abuse in wastewater and surface water by solid-phase extraction and liquid chromatography-positive electrospray ionisation tandem mass spectrometry. *J. Chromatogr. A* **2011**, *1218*, (12), 1620-1631.
44. Repice, C.; Dal Grande, M.; Maggi, R.; Pedrazzani, R., Licit and illicit drugs in a wastewater treatment plant in Verona, Italy. *Sci. Total Environ.* **2013**, *463*, 27-34.
45. Zuccato, E.; Castiglioni, S.; Bagnati, R.; Melis, M.; Fanelli, R., Source, occurrence and fate of antibiotics in the Italian aquatic environment. *J. Hazard. Mater.* **2010**, *179*, (1-3), 1042-1048.
46. Castiglioni, S.; Zuccato, E.; Crisci, E.; Chiabrando, C.; Fanelli, R.; Bagnati, R., Identification and measurement of illicit drugs and their metabolites in urban wastewater by liquid chromatography-tandem mass spectrometry. *Anal. Chem.* **2006**, *78*, (24), 8421-8429.
47. da Silva, B. F.; Jelic, A.; Lopez-Serna, R.; Mozeto, A. A.; Petrovic, M.; Barcelo, D., Occurrence and distribution of pharmaceuticals in surface water, suspended solids and sediments of the Ebro river basin, Spain. *Chemosphere* **2011**, *85*, (8), 1331-1339.
48. Vazquez-Roig, P.; Andreu, V.; Blasco, C.; Pico, Y., SPE and LC-MS/MS determination of 14 illicit drugs in surface waters from the Natural Park of L'Albufera (Valencia, Spain). *Anal. Bioanal. Chem.* **2010**, *397*, (7), 2851-2864.
49. Vazquez-Roig, P.; Andreu, V.; Blasco, C.; Morillas, F.; Pico, Y., Spatial distribution of illicit drugs in surface waters of the natural park of Pego-Oliva Marsh (Valencia, Spain). *Environ. Sci. Pollut. Res.* **2012**, *19*, (4), 971-982.
50. Postigo, C.; de Alda, M. J. L.; Barcelo, D., Drugs of abuse and their metabolites in the Ebro River basin: Occurrence in sewage and surface water, sewage treatment plants removal efficiency, and collective drug usage estimation. *Environ. Int.* **2010**, *36*, (1), 75-84.
51. Zhang, S. Y.; Zhang, Q. A.; Darisaw, S.; Ehie, O.; Wang, G. D., Simultaneous quantification of polycyclic aromatic hydrocarbons (PAHs), polychlorinated biphenyls (PCBs), and pharmaceuticals and personal care products (PPCPs) in Mississippi river water, in New Orleans, Louisiana, USA.

*Chemosphere* **2007**, 66, (6), 1057-1069.

52. Jones-Lepp, T. L.; Sanchez, C.; Alvarez, D. A.; Wilson, D. C.; Taniguchi-Fu, R. L., Point sources of emerging contaminants along the Colorado River Basin: Source water for the arid Southwestern United States. *Sci. Total Environ.* **2012**, 430, 237-245.
53. Bartelt-Hunt, S. L.; Snow, D. D.; Damon, T.; Shockley, J.; Hoagland, K., The occurrence of illicit and therapeutic pharmaceuticals in wastewater effluent and surface waters in Nebraska. *Environ. Pollut.* **2009**, 157, (3), 786-791.
54. Spongberg, A. L.; Witter, J. D., Pharmaceutical compounds in the wastewater process stream in Northwest Ohio. *Sci. Total Environ.* **2008**, 397, (1-3), 148-157.
55. Gago-Ferrero, P.; Mastroianni, N.; Diaz-Cruz, M. S.; Barcelo, D., Fully automated determination of nine ultraviolet filters and transformation products in natural waters and wastewaters by on-line solid phase extraction-liquid chromatography-tandem mass spectrometry. *J. Chromatogr. A* **2013**, 1294, 106-116.
56. Loos, R.; Carvalho, R.; Antonio, D. C.; Cornero, S.; Locoro, G.; Tavazzi, S.; Paracchini, B.; Ghiani, M.; Lettieri, T.; Blaha, L.; Jarosova, B.; Voorspoels, S.; Servaes, K.; Haglund, P.; Fick, J.; Lindberg, R. H.; Schwesig, D.; Gawlik, B. M., EU-wide monitoring survey on emerging polar organic contaminants in wastewater treatment plant effluents. *Water Res.* **2013**, 47, (17), 6475-6487.
57. Loos, R.; Gawlik, B. M.; Locoro, G.; Rimaviciute, E.; Contini, S.; Bidoglio, G., EU-wide survey of polar organic persistent pollutants in European river waters. *Environ. Pollut.* **2009**, 157, (2), 561-568.
58. Diaz-Cruz, M. S.; Gago-Ferrero, P.; Llorca, M.; Barcelo, D., Analysis of UV filters in tap water and other clean waters in Spain. *Anal. Bioanal. Chem.* **2012**, 402, (7), 2325-2333.
